# Supplementary material for: Bright luminescent lithium and magnesium carbene complexes
Source: Royal Society of Chemistry journal article supplement (doi:10.1039/d1sc00846c), 2021-01-01
Supplement: d1sc00846c1.pdf [file d1sc00846c1.pdf]

## Supplementary Information for

# Bright Luminescent Lithium and Magnesium Carbene Complexes

Piermaria Pinter,<sup>a,§</sup> Christoph M. Schüßlbauer,<sup>b,§</sup> Fabian A. Watt,<sup>c,§</sup> Nicole Dickmann,<sup>c</sup> Regine Herbst-Irmer,<sup>d</sup> Bernd Morgenstern,<sup>e</sup> Annette Grünwald,<sup>a,f</sup> Tobias Ullrich,<sup>b</sup> Michael Zimmer,<sup>g</sup> Dirk M. Guldi,<sup>\*b</sup> Stephan Hohloch,<sup>\*h</sup> Dominik Munz<sup>\*a,f</sup>

<sup>a</sup> Piermaria Pinter, Prof. Dr. Dominik Munz

Department of Chemistry and Pharmacy, Inorganic and General Chemistry Friedrich-Alexander University Erlangen-Nürnberg Egerlandstr. 1, D-91058 Erlangen, Germany.

<sup>b</sup> Christoph M. Schüßlbauer, Tobias Ullrich, Prof. Dr. Dr. h. c. Dirk M. Guldi Department of Chemistry and Pharmacy Interdisciplinary Center of Molecular Materials (ICMM) Friedrich-Alexander University Erlangen-Nürnberg Egerlandstraße 3, D-91058 Erlangen, Germany

<sup>c</sup> Fabian A. Watt, Nicole Dickmann

Department of Chemistry, Inorganic Chemistry, Paderborn University  
Warburger Straße 100, D-33098 Paderborn, Germany

<sup>d</sup> Dr. Regine Herbst-Irmer

University of Göttingen, Institute of Inorganic Chemistry, Tammannstraße 4, D-37077 Göttingen, Germany

<sup>e</sup> Dr. Bernd Morgenstern, Dr. Michael Zimmer

Inorganic Solid State Chemistry Saarland University, Campus C4.1, D-66123 Saarbrücken, Germany.

<sup>f</sup> Annette Grünwald, Prof. Dr. Dominik Munz

Inorganic Chemistry: Coordination Chemistry, Saarland University, Campus C4.1, D-66123 Saarbrücken, Germany.

<sup>g</sup> Dr. M. Zimmer

Inorganic and General Chemistry, Saarland University, Campus C4.1, D-66123 Saarbrücken, Germany.

<sup>h</sup> Prof. Dr. Stephan Hohloch

Institute of General, Inorganic and Theoretical Chemistry, University of Innsbruck, Innrain 80-82, A-6020 Innsbruck, Austria

<sup>§</sup> Authors contributed equally.

## Table of Contents

|                                                  |         |
|--------------------------------------------------|---------|
| 1. Synthetical Methods – General                 | S2-S13  |
| 2. Photospectroscopic Investigations             | S14-S15 |
| 3. Diffusion NMR (DOSY)                          | S17     |
| 4. X-ray Single Crystal Structure Determinations | S19-S21 |
| 5. Computational Details – General               | S22-S28 |
| 6. XYZ Coordinates                               | S29-S35 |
| 7. Supplementary References                      | S36     |

## 1. Synthetical Methods – General

All synthetic work (except synthesis of the proligand **3**) was performed in a nitrogen-filled glovebox.  $^1\text{H}$ ,  $^7\text{Li}$  and  $^{13}\text{C}$  NMR spectra were recorded on Bruker AV-500, Ascent 700 and JEOL ECX 400 instruments. The chemical shifts  $\delta$  are calculated in ppm; the solvent residual signals of incompletely deuterated solvent molecules were used as an internal reference for the  $^1\text{H}$  NMR spectra and the carbon solvent signals for  $^{13}\text{C}$  NMR spectral data or external standards ( $^7\text{Li}$  NMR was referenced to 1M LiCl in  $\text{D}_2\text{O}$  and  $^{15}\text{N}$  NMR spectra to ammonia). Solvents were purified using a two-column solid-state purification system (Glass Contour System, Irvine, CA), transferred to the glovebox without exposure to air and stored over a mirror of potassium or activated molecular sieves, respectively. NMR solvents were obtained dry and packaged under argon and as well stored over a mirror of potassium or activated molecular sieves. 3,6-di-*tert*-butyl-carbazole-1,8-diazide and TBTA were synthesized according to the literature.<sup>1, 2</sup> IR spectra were recorded at room temperature under inert conditions using a Bruker Vertex 70 with ATR equipment. Elemental analyses were performed using Elementar vario microcube instruments (University of Paderborn and University of Saarland). Compound **1** was prepared following the procedure reported by Limberg, Hecht and co-workers.<sup>3</sup>

**2:** A solution of copper sulfate (40 mg, 0.25 mmol, 0.1 eq.) in water (2 mL) was added to a mixture of 3,6-di-*tert*-butyl-carbazole-1,8-diazide (867 mg, 2.4 mmol, 1 eq.), 6-chloro-hex-1-yne (641 mg, 0.67 mL, 5.5 mmol, 2.3 eq.), sodium ascorbate (125 mg, 0.6 mmol, 0.25 eq.) and tris[(1-benzyl-1*H*-1,2,3-triazol-4-yl)methyl]amine (TBTA, 133 mg, 0.25 mmol, 0.1 eq) in a mixture of dichloromethane (10 mL), *tert*-butanol (10 mL) and water (2 mL). The reaction mixture was stirred at room temperature under an atmosphere of argon for 16 h. The beige-colored suspension was filtered, and the precipitate washed with *n*-pentane (2 × 10 mL). The solid was extracted with dichloromethane (2 × 25 mL) and filtered. All volatiles were removed under reduced pressure and the off-white-colored solid was further dried *in vacuo* to yield the desired product in 74% (1.78 mmol, 1.06 g).  **$^1\text{H}$  NMR** ( $\text{CDCl}_3$ , 298 K, 700 MHz): 10.78 (s, 1H, carbazole-NH), 8.16 (d,  $J = 1.3$  Hz, 2H, Aryl-*H*), 7.98 (s, 2H, triazole-5*H*), 7.59 (d,  $J = 1.3$  Hz, 2H, Aryl-*H*), 3.64 (t,  $J = 6.3$  Hz, 4H, -CH<sub>2</sub>Cl), 2.92 (t,  $J = 7.4$  Hz, 4H, CH<sub>2</sub>), 1.96 (m, 8H, CH<sub>2</sub>), 1.51 (s, 18H, C(CH<sub>3</sub>)<sub>3</sub>) ppm;  **$^{13}\text{C}$  NMR** ( $\text{CDCl}_3$ , 298 K, 175 MHz): 147.8 (Aryl-C), 143.4 (Aryl-C), 130.3 (Aryl-C), 129.4 (Aryl-C), 128.3 (Aryl-C), 125.8 (Aryl-C), 121.5 (Aryl-C), 119.0 (triazole-5C), 116.7 (Aryl-CH), 114.6 (Aryl-CH), 45.0 (-CH<sub>2</sub>Cl), 35.1 (C(CH<sub>3</sub>)<sub>3</sub>), 32.1 (CH<sub>2</sub>) 32.1 (C(CH<sub>3</sub>)<sub>3</sub>), 26.7 (CH<sub>2</sub>), 25.1 (CH<sub>2</sub>) ppm.

**3:** The synthetic protocol for the internal cyclisation was adapted from a literature known protocol to design 1,2,3-triazolium derived ionic liquids<sup>4</sup>: A mixture of **2** (975 mg, 1.64 mmol, 1 eq.) and potassium iodide (5.46 g, 32.9 mmol, 20 eq.) was heated in acetonitrile (50 mL) at 90 °C for 44 h. All volatiles were then removed under reduced pressure. The remaining solid was extracted with dichloromethane (3 × 50 mL) and filtered. The filtrate was concentrated to 20 mL and added dropwise to a stirred solution of diethylether (300 mL). The precipitate was filtered off and washed with diethylether (100 mL) and *n*-pentane (30 mL). The beige-colored solid was dried *in vacuo* to yield the desired product in 96% (1.57 mmol, 1.22 g).  **$^1\text{H}$  NMR** ( $\text{CD}_2\text{Cl}_2$ , 298 K, 300 MHz): 11.00 (s, 1H, carbazole-NH), 8.91 (s, 2H, triazole-5*H*), 8.43 (d,  $J = 1.3$  Hz, 2H, Aryl-*H*), 7.78 (d,  $J = 1.3$  Hz, 2H, Aryl-*H*), 4.79 (t,  $J = 6.1$  Hz, 4H, N-

CH<sub>2</sub>), 3.24 (t, *J* = 6.4 Hz, 4H, CH<sub>2</sub>), 2.36 (pent, *J* = 6.0 Hz, 4H, CH<sub>2</sub>), 2.15 (dt, *J* = 11.5, 6.0 Hz, 4H, CH<sub>2</sub>), 1.50 (s, 18H, C(CH<sub>3</sub>)<sub>3</sub>) ppm. **<sup>13</sup>C NMR** (CD<sub>2</sub>Cl<sub>2</sub>, 298 K, 125 MHz): 145.1 (Aryl-C), 142.6 (Aryl-C), 133.2 (Aryl-C), 129.8 (triazolium-5C), 126.4 (Aryl-C), 121.3 (Aryl-CH), 121.3 (Aryl-CH), 119.6 (Aryl-C), 50.7 (N-CH<sub>2</sub>), 35.6 (C(CH<sub>3</sub>)<sub>3</sub>), 32.1 (C(CH<sub>3</sub>)<sub>3</sub>), 21.9 (CH<sub>2</sub>), 21.4 (CH<sub>2</sub>), 18.5 (CH<sub>2</sub>) ppm; **<sup>15</sup>N NMR** (DMSO-d<sub>6</sub>, 298 K, 125 MHz): 112.6 (NH), 151.9 (N-Aryl), 247.6 (N-CH<sub>2</sub>), 335.1 (N<sub>2</sub>). **HR-MS** (ESI+) calcd. for [C<sub>32</sub>H<sub>41</sub>N<sub>7</sub>]<sup>2+</sup> 261.6712; found 261.6722. **Elemental analysis** calcd. for C<sub>32</sub>H<sub>41</sub>N<sub>7</sub>I<sub>2</sub> C 49.43, H 5.32, N 12.61; found C 49.82, H. 5.30, N 12.88. **MP** 358 °C.

**4:** In a vial, 100 mg of **3** (0.13 mmol, 1 eq.) were suspended in 4 mL of THF and. LiHMDS (22 mg, 0.13 μmol, 1 eq.) was added. Immediately, the solution turned intense orange. The reaction mixture was stirred at room temperature for 2 hours and then filtered. The residue was washed with THF (2x 5 mL) then pentane (2x 20 mL) and then the orange solid was dried *in vacuo* to yield the desired product in 90% (0.13 mmol, 75 mg). **<sup>1</sup>H NMR** (DMSO-d<sub>6</sub>, 298 K, 400 MHz): δ = 10.37 (s, 2H, CH<sub>triazolium</sub>), 8.46 (s, 2H, ArH), 7.95 (m, 2H, ArH), 4.71 (m, 4H, CH<sub>2</sub>), 3.15 (m, 4H, CH<sub>2</sub>), 2.21 (m, 4H, CH<sub>2</sub>), 2.00 (m, 4H, CH<sub>2</sub>), 1.47 (s, 18H, C(CH<sub>3</sub>)<sub>3</sub>) ppm. **<sup>13</sup>C NMR** (DMSO-d<sub>6</sub>, 298 K, 101 MHz): δ = 142.6 (ArC), 139.5 (ArC), 136.5 (ArC), 128.3 (ArC), 127.5 (ArCH), 120.1 (ArC), 119.4 (ArCH), 112.8 (ArCH) 48.6 (N-CH<sub>2</sub>), 34.5 (C(CH<sub>3</sub>)<sub>3</sub>), 32.0 (C(CH<sub>3</sub>)<sub>3</sub>), 21.2 (CH<sub>2</sub>), (CH<sub>2</sub>), 20.2 (CH<sub>2</sub>), 17.8 (CH<sub>2</sub>) ppm. **MP** 341 °C (decomposition). **Elemental analysis** calcd. for C<sub>32</sub>H<sub>41</sub>N<sub>7</sub>I<sub>2</sub> 1.35Lil C 46.29, H 4.86, N 11.81; found C 46.13, H. 5.62, N 11.24.

**<sup>Li</sup>5:** In a vial, 100 mg of **3** (0.13 mmol, 1 eq.) were suspended in 2 mL of Et<sub>2</sub>O and LiHMDS (71 mg, 0.42 μmol, 3.2 eq.) was added. The reaction mixture was stirred at room temperature for 20 hours and then filtered. The product was precipitated by addition of pentane, washed with cold pentane (2x 20 mL) and the yellow-lime solid was dried *in vacuo* to yield the desired product in 39% (0.02 mmol, 47 mg). **<sup>1</sup>H NMR** (DMSO-d<sub>6</sub>, 298 K, 400 MHz): δ = 8.10 (m, 2H, ArH), 8.00 (m, 2H, ArH), 4.51 (m, 4H, CH<sub>2</sub>), 3.06 (m, 4H, CH<sub>2</sub>), 2.10 (m, 4H, CH<sub>2</sub>), 1.94 (m, 4H, CH<sub>2</sub>), 1.46 (s, 18H, C(CH<sub>3</sub>)<sub>3</sub>) ppm. **<sup>13</sup>C NMR** (DMSO-d<sub>6</sub>, 298 K, 101 MHz): δ = 187.1 (C<sub>carbene</sub>), 143.4 (ArC), 142.7 (ArC), 135.6 (ArC), 127.1 (ArC), 126.9 (ArC), 115.4 (ArC), 112.2 (ArC), 65.0 (N-CH<sub>2</sub>), 34.4 (C(CH<sub>3</sub>)<sub>3</sub>), 32.4 (C(CH<sub>3</sub>)<sub>3</sub>), 22.3 (CH<sub>2</sub>), 20.0 (CH<sub>2</sub>), 15.2 (CH<sub>2</sub>) ppm. **<sup>7</sup>Li NMR** (DMSO-d<sub>6</sub>, 298 K, 155.51 MHz): δ = -1.43 ppm. **MP** 223 °C (decomposition). **Elemental analysis** calcd. for C<sub>32</sub>H<sub>41</sub>N<sub>7</sub>I<sub>2</sub> 5.22Lil C 31.14, H 3.12, N 8.00; found C 30.31, H. 4.18, N 7.07; after several recrystallizations calcd. for C<sub>32</sub>H<sub>41</sub>N<sub>7</sub>I<sub>2</sub> 0.33Lil C 66.90, H 6.67, N 17.07; found C 67.08, H. 7.15, N 17.13.

**MgBr5:** In a vial, 100 mg of **3** (64 μmol, 1 eq.) were suspended in 2 mL of Et<sub>2</sub>O. LiHMDS (71 mg, 0.4 mmol, 3.3 eq.) was added and the reaction mixture was stirred for 6 hours at room temperature. Afterwards, the solution was filtered and all the volatiles were removed under vacuum. The residue was washed with pentane (2x 20 mL). Next, the solid was dissolved in 1 mL of Et<sub>2</sub>O and 24 mg of dry MgBr<sub>2</sub> (71 μmol, 1.1 eq.) were added. The reaction was stirred for 4 h at room temperature, during which a yellow solid formed. The solid was separated, washed with Et<sub>2</sub>O 2x 2 mL, pentane 2x 5 mL and dried *in vacuo* to yield the desired product in 66% (0.09 mmol, 53 mg). **<sup>1</sup>H NMR** (DMSO-d<sub>6</sub> 298 K, 400 MHz): δ = 8.26 (m, 2H, ArH), 8.17 (m, 2H, ArH), 4.57 (m, 4H, CH<sub>2</sub>), 3.13 (m, 4H, CH<sub>2</sub>), 2.14 (m, 4H, CH<sub>2</sub>), 1.94

(m, 4H, CH<sub>2</sub>), 1.47 (s, 18H, C(CH<sub>3</sub>)<sub>3</sub>) ppm; **<sup>13</sup>C NMR** (DMSO-d<sub>6</sub>, 298 K, 101 MHz): δ = 174.9 (s, C<sub>carbene</sub>), 144.7 (ArC), 140.7 (ArC), 137.1 (ArC), 127.8 (ArC), 125.3 (ArC), 116.1 (ArC), 112.8 (ArC), 67.0 (CH<sub>2</sub>), 46.8 (CH<sub>2</sub>), 34.4 (C(CH<sub>3</sub>)<sub>3</sub>), 32.1 (C(CH<sub>3</sub>)<sub>3</sub>), 23.0 (CH<sub>2</sub>), 22.2 (CH<sub>2</sub>), 19.8 (CH<sub>2</sub>) ppm. **HR-MS** (ESI+) m/z: [M + H]<sup>+</sup> calcd. for C<sub>32</sub>H<sub>41</sub>BrN<sub>7</sub> 602.26013; found 602.25701 (hydrolysis product). **MP** 189 °C (decomposition). **Elemental analysis** Despite of repeated attempts and our best efforts, the compound hydrolyzed during the elemental analysis. The NMR spectroscopic analysis (*cf* Fig S17) and the UV spectra confirm the absence of water in the sample. Calcd. for C<sub>32</sub>H<sub>38</sub>BrMgN<sub>7</sub> \*1.76 H<sub>2</sub>O 0.4 \*Et<sub>2</sub>O C 58.22, H 6.78, N 14.49; found C 58.55, H. 7.11, N 14.16.

### Synthesis of <sup>MgBr</sup>5 with MeMgBr

Ligand **3** (30 mg, 0.04 mmol, 1.0 eq.) was suspended in 1 mL of diethylether and 1M MeMgBr in diethylether (13.5 μL, 0.12 mmol, 3.0 eq.) was added. The suspension turned immediately yellow. The solvent was removed *in vacuo* to give a yellow residue. The <sup>1</sup>H NMR spectroscopic analysis in DMSO-d<sub>6</sub> corroborated the clean and quantitative conversion to <sup>MgBr</sup>5. Note, no signals for a methyl complex (between 0 and -50 ppm) was found, whereas the *in-situ* reaction in deuterated benzene (Fig S19) revealed a singlet at 0.16 ppm, which can be assigned to free methane.

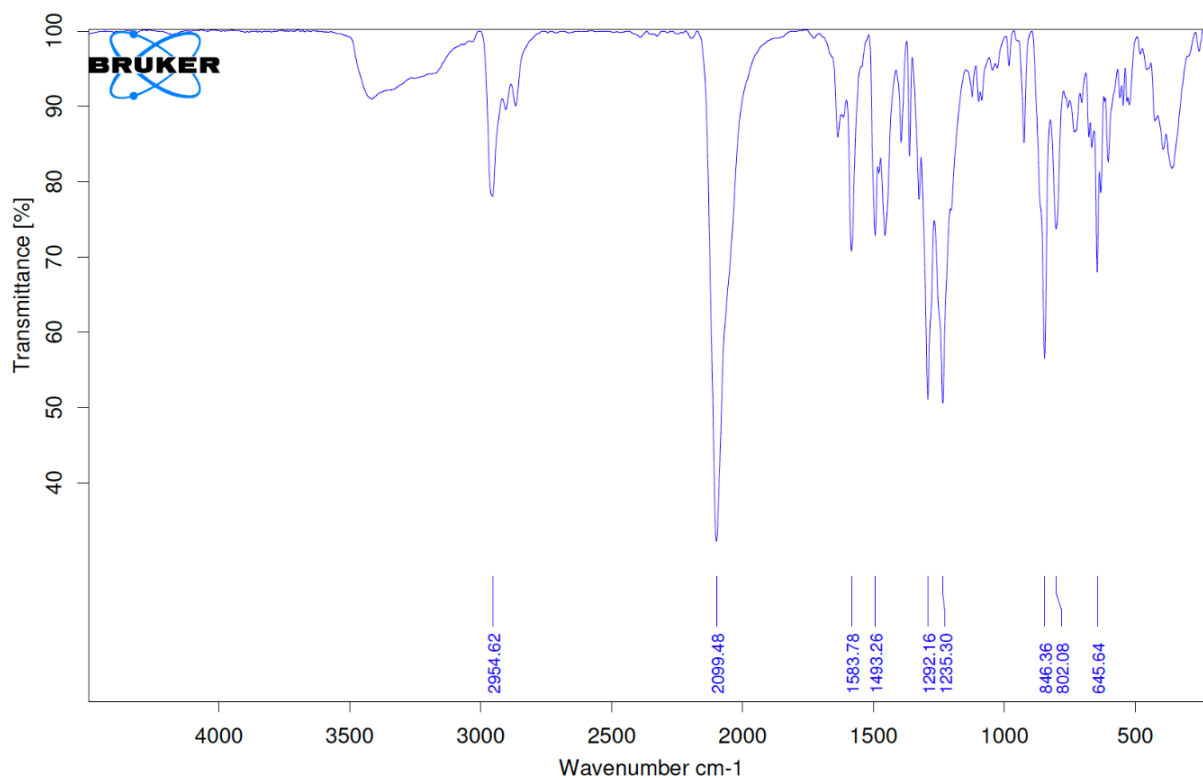

**Fig. S1** IR spectrum of compound **1**.



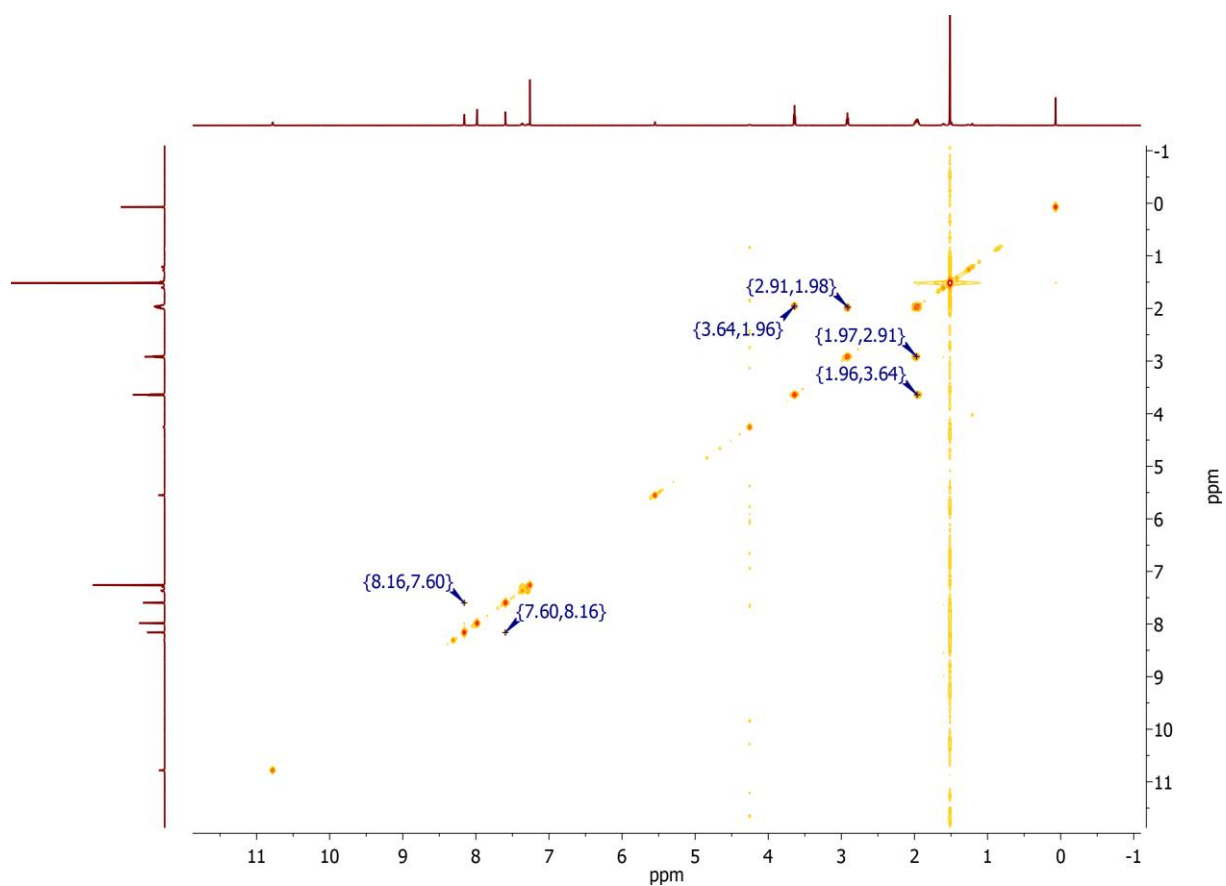

**Fig S4** <sup>1</sup>H-<sup>1</sup>H COSY spectrum of compound **2**, measured in CDCl<sub>3</sub>.

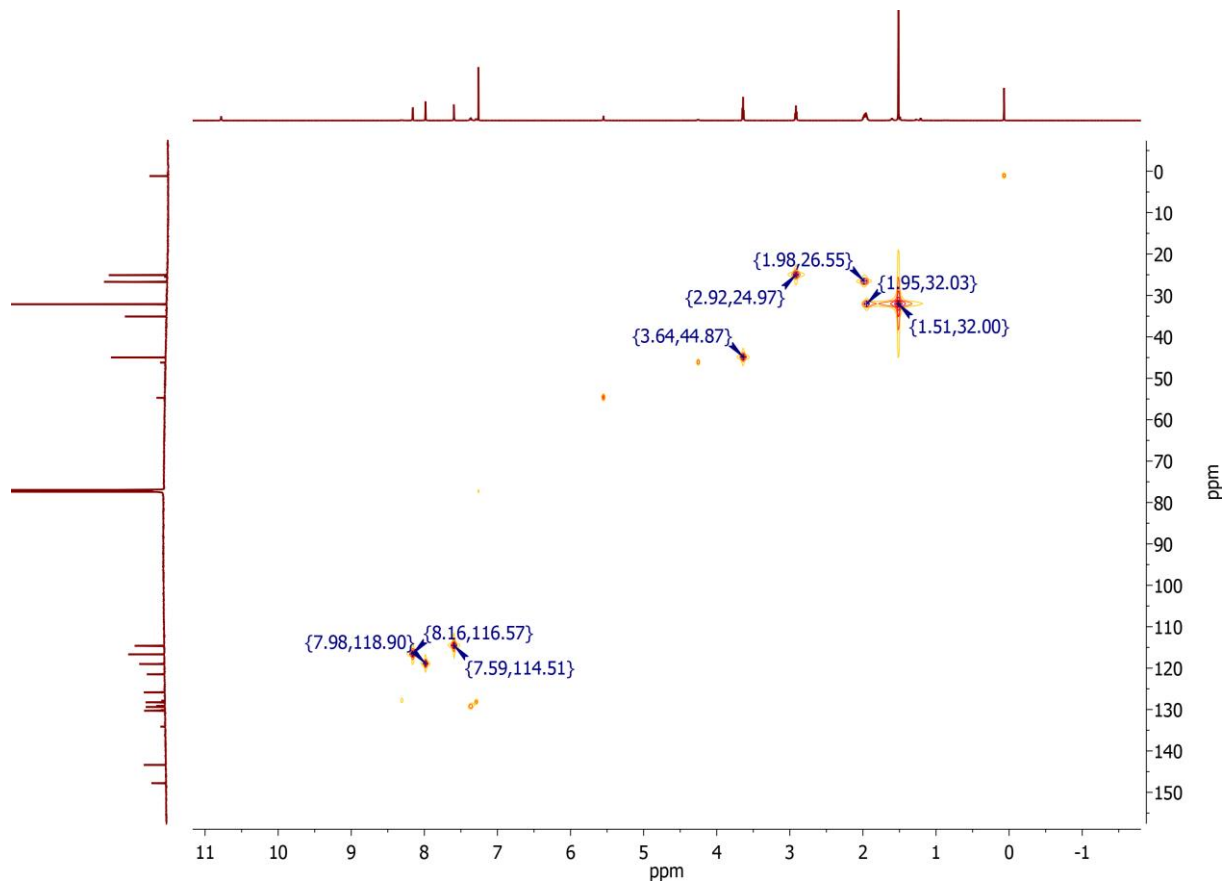

**Fig. S5** <sup>1</sup>H-<sup>13</sup>C HSQC spectrum of compound **2**, measured in CDCl<sub>3</sub>.

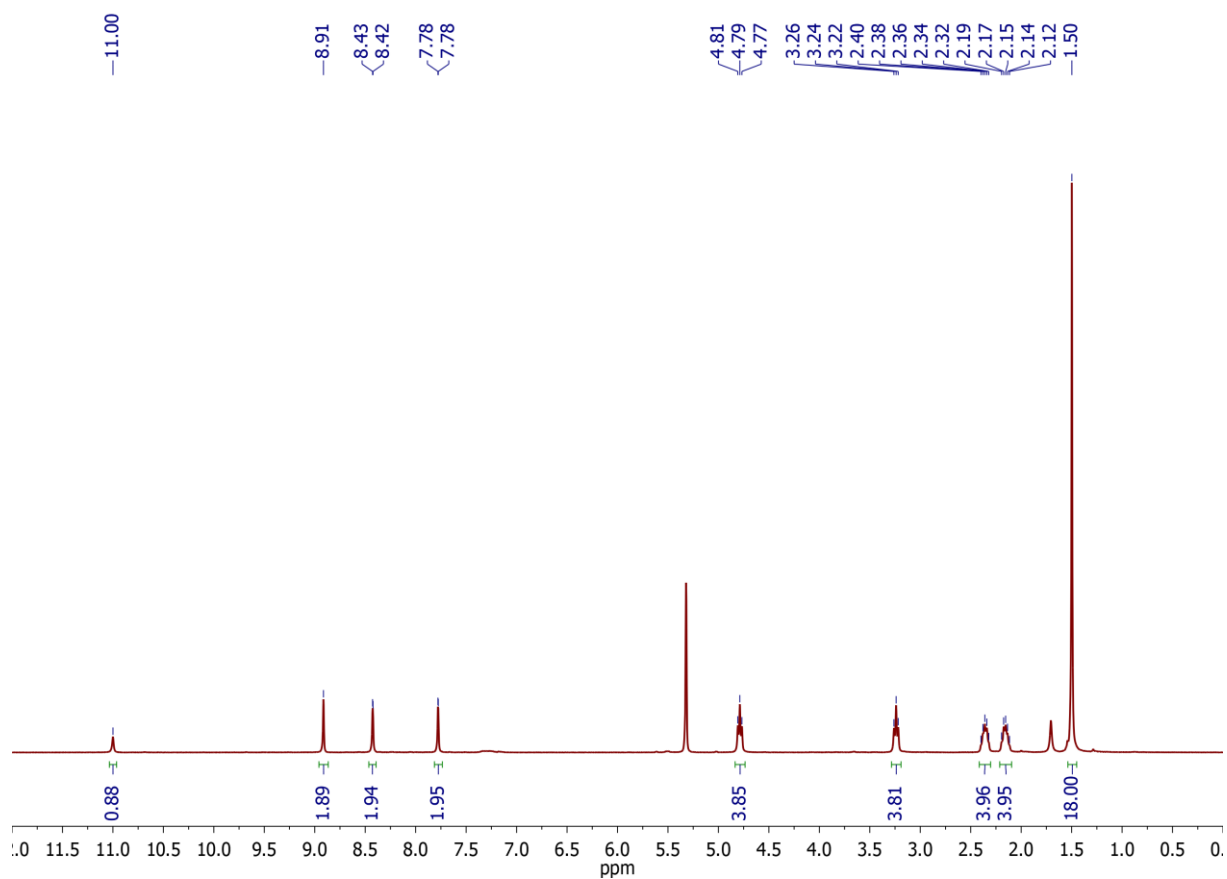

**Fig. S6** <sup>1</sup>H NMR spectrum of compound **3**, measured in CD<sub>2</sub>Cl<sub>2</sub>.

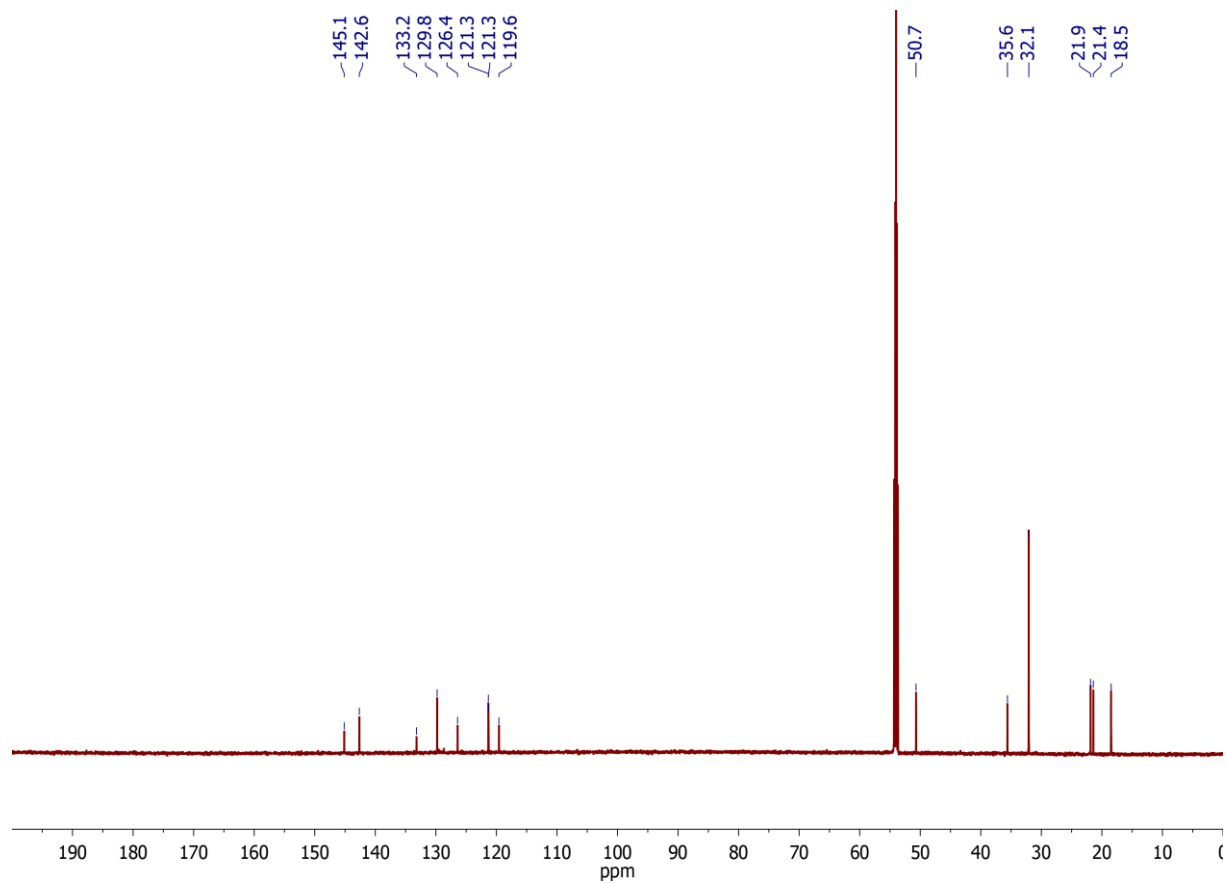

**Fig. S7** <sup>13</sup>C NMR spectrum of compound **3**, measured in CD<sub>2</sub>Cl<sub>2</sub>.

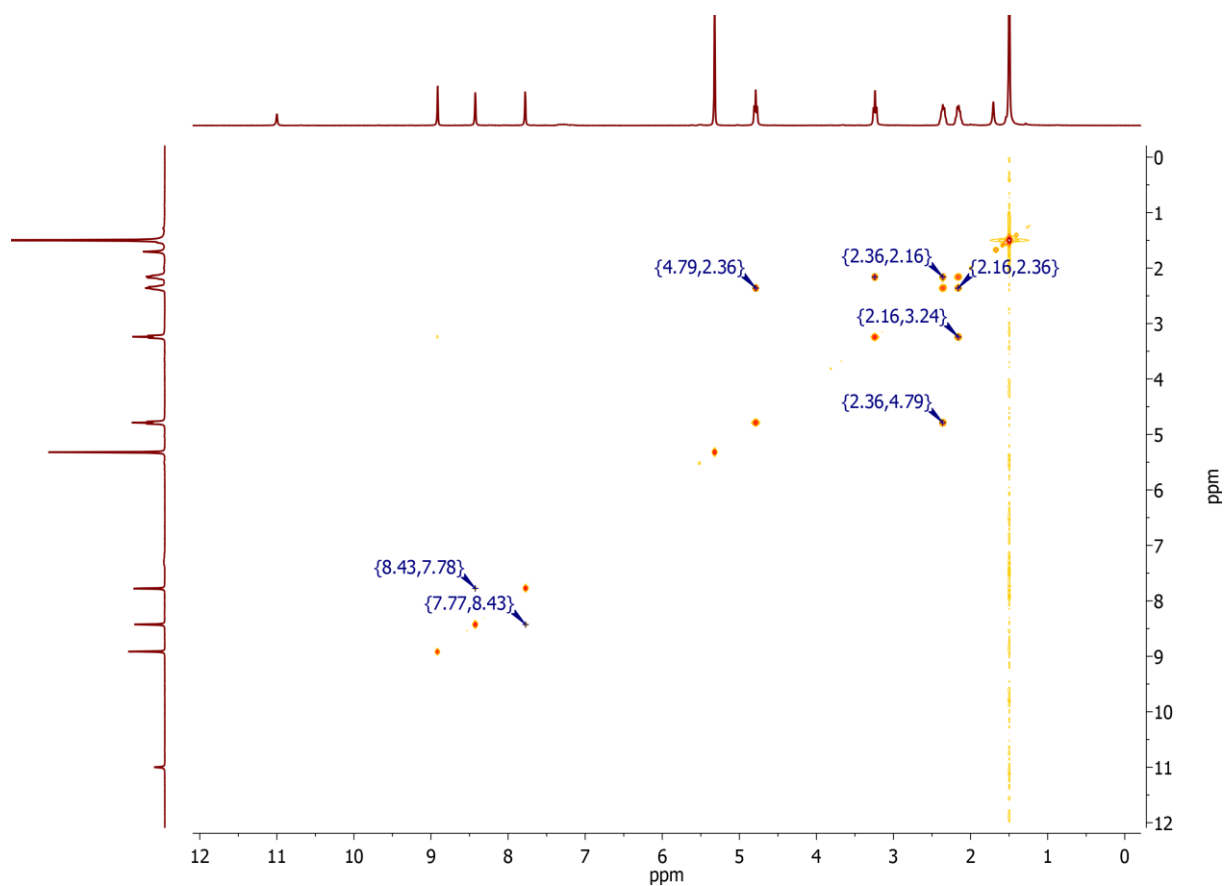

**Fig. S8**  $^1\text{H}$ - $^1\text{H}$  COSY spectrum of compound **3**, measured in  $\text{CD}_2\text{Cl}_2$ .

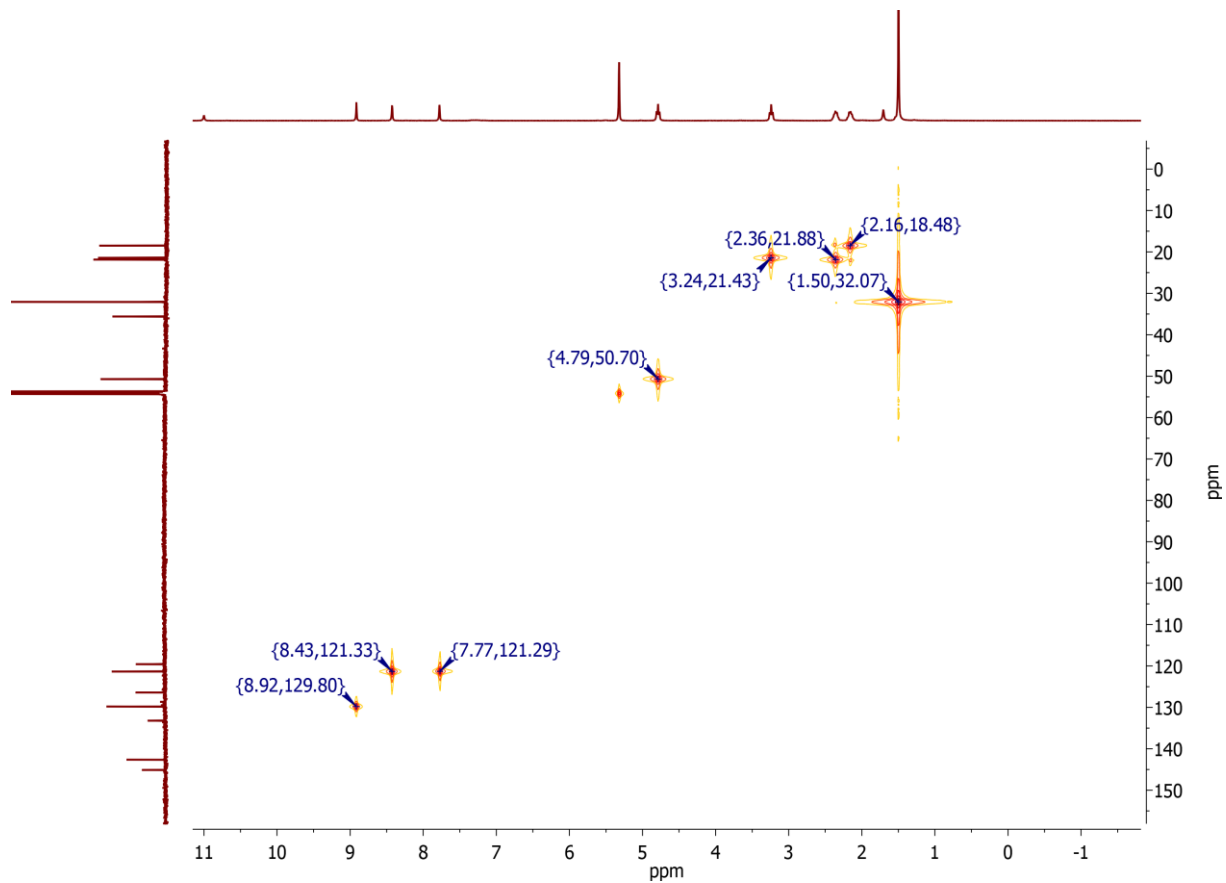

**Fig. S9**  $^1\text{H}$ - $^{13}\text{C}$  HSQC spectrum of compound **3**, measured in  $\text{CD}_2\text{Cl}_2$ .



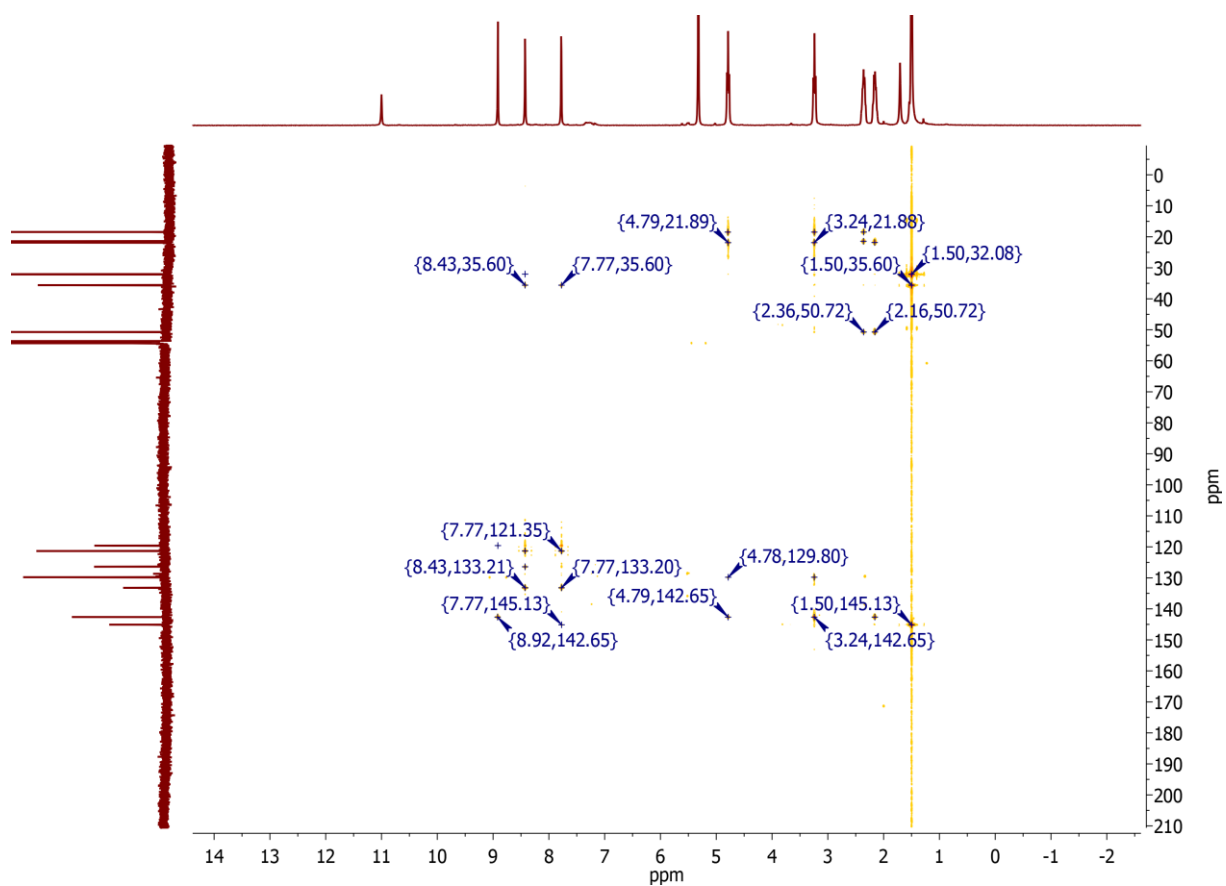

**Fig. S10**  $^1\text{H}$ – $^{13}\text{C}$  HMBC spectrum of compound **3**, measured in  $\text{CD}_2\text{Cl}_2$ .

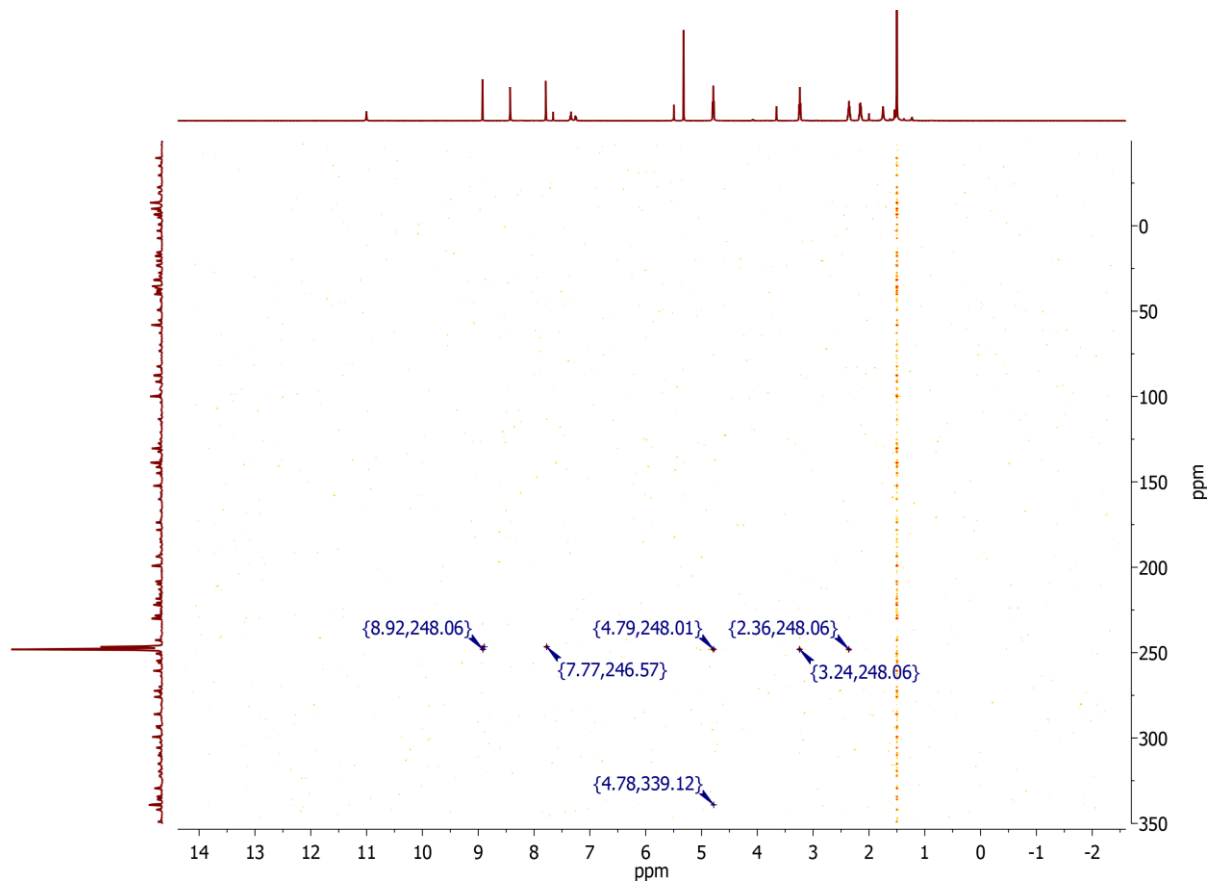

**Fig. S11**  $^1\text{H}$ – $^{15}\text{N}$  HMBC spectrum of compound **3**, measured in  $\text{CD}_2\text{Cl}_2$ .

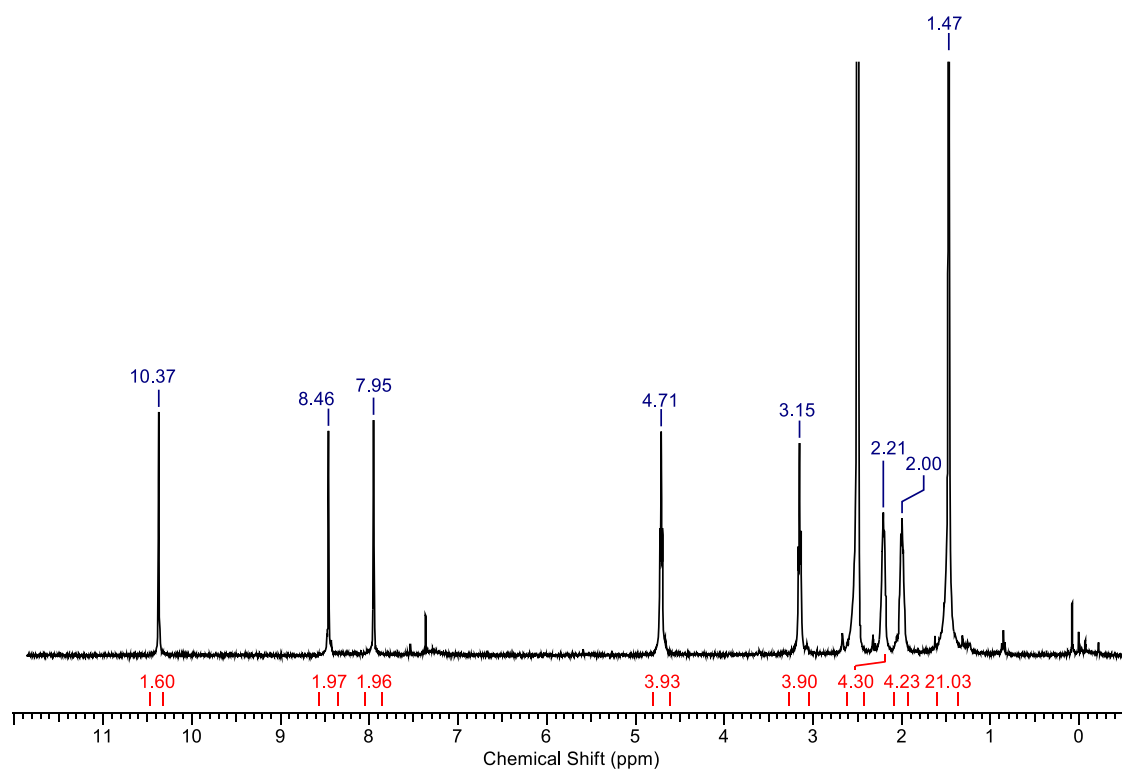

**Fig. S12** <sup>1</sup>H NMR spectrum of compound **4**, measured in DMSO-d<sub>6</sub>.

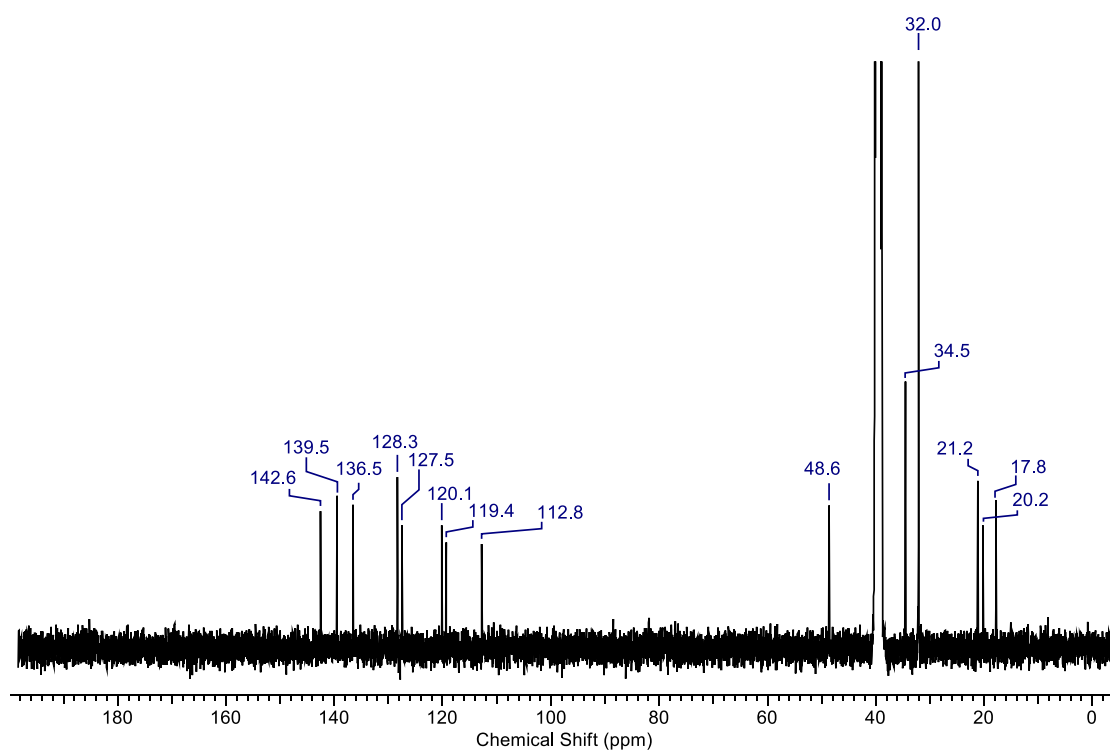

**Fig. S13** <sup>13</sup>C NMR spectrum of compound **4**, measured in DMSO-d<sub>6</sub>.

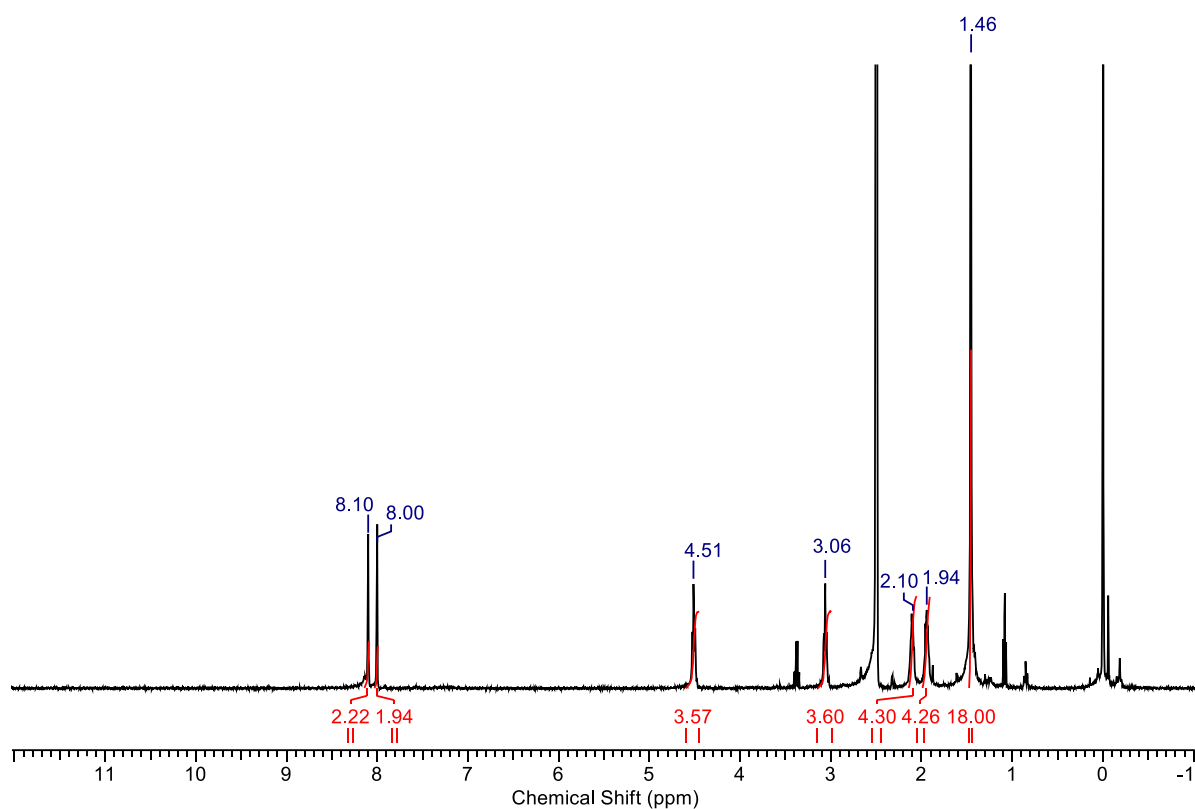

**Fig. S14** <sup>1</sup>H NMR spectrum of compound **Li5**, measured in DMSO<sub>d6</sub>.

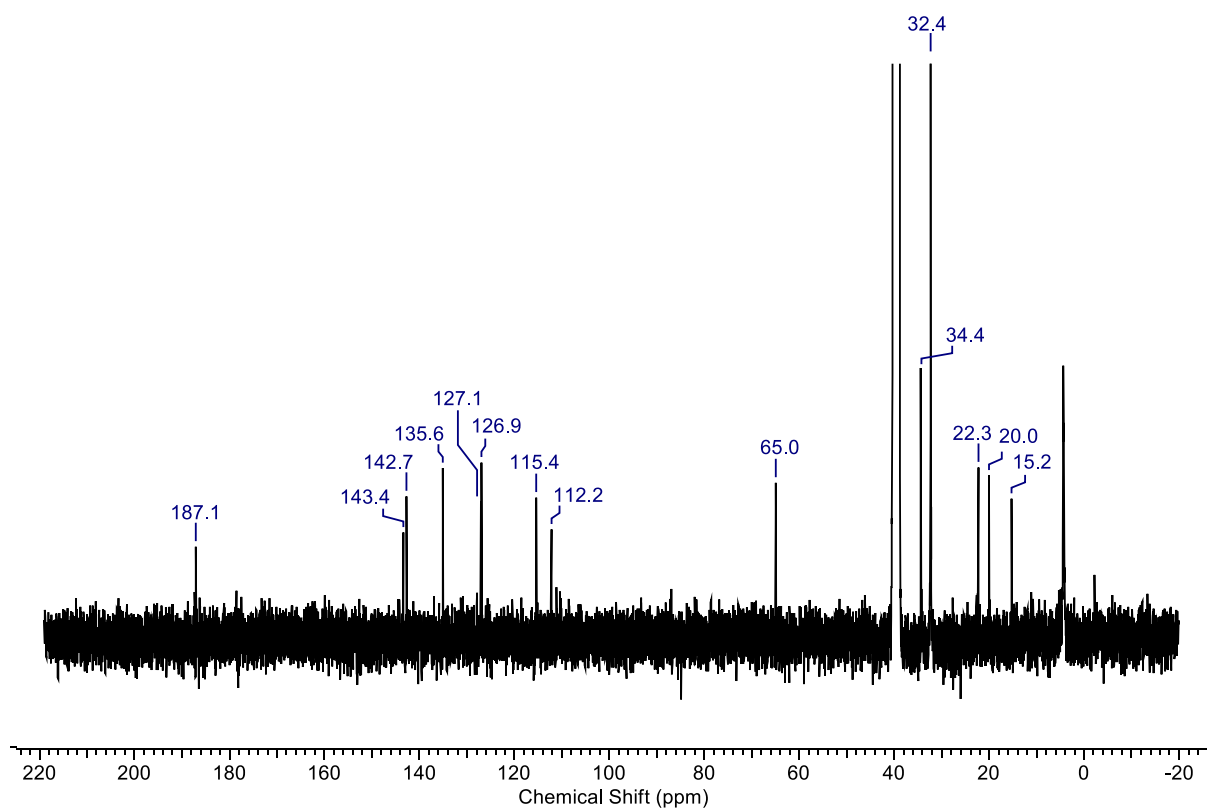

**Fig. S15** <sup>13</sup>C NMR spectrum of compound **Li5**, measured in DMSO<sub>d6</sub>.

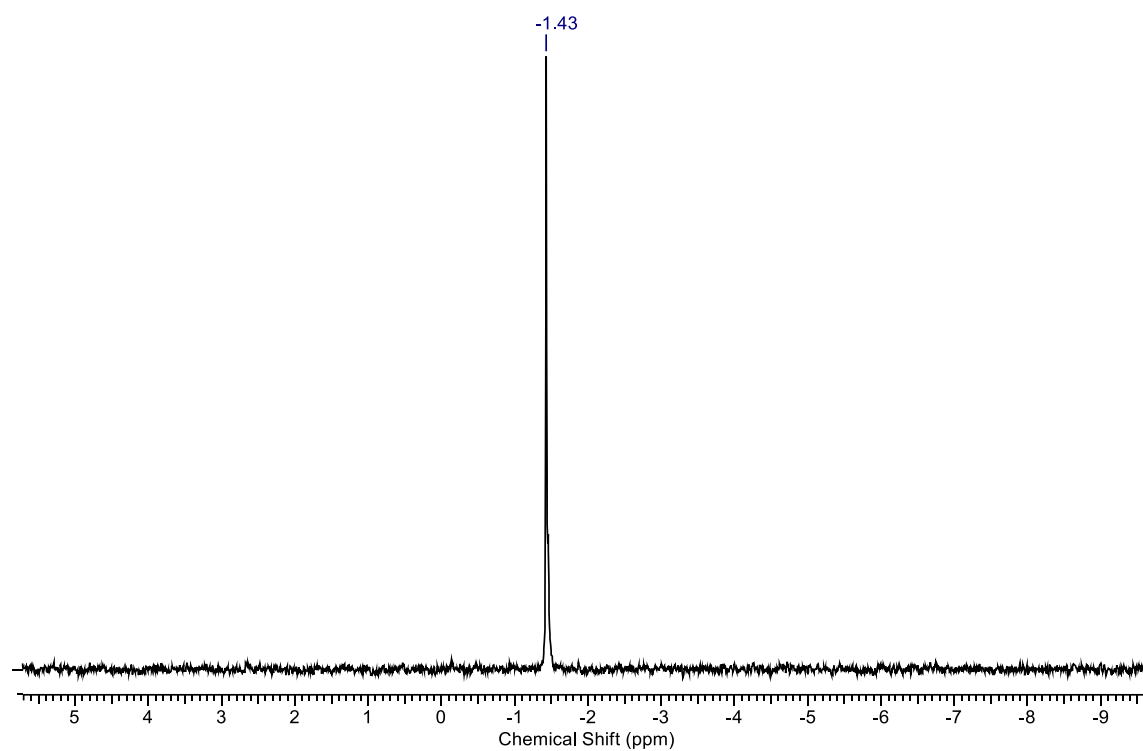

**Fig. S16**  $^7\text{Li}$  NMR spectrum of compound **5**, measured in  $\text{DMSO-d}_6$ .

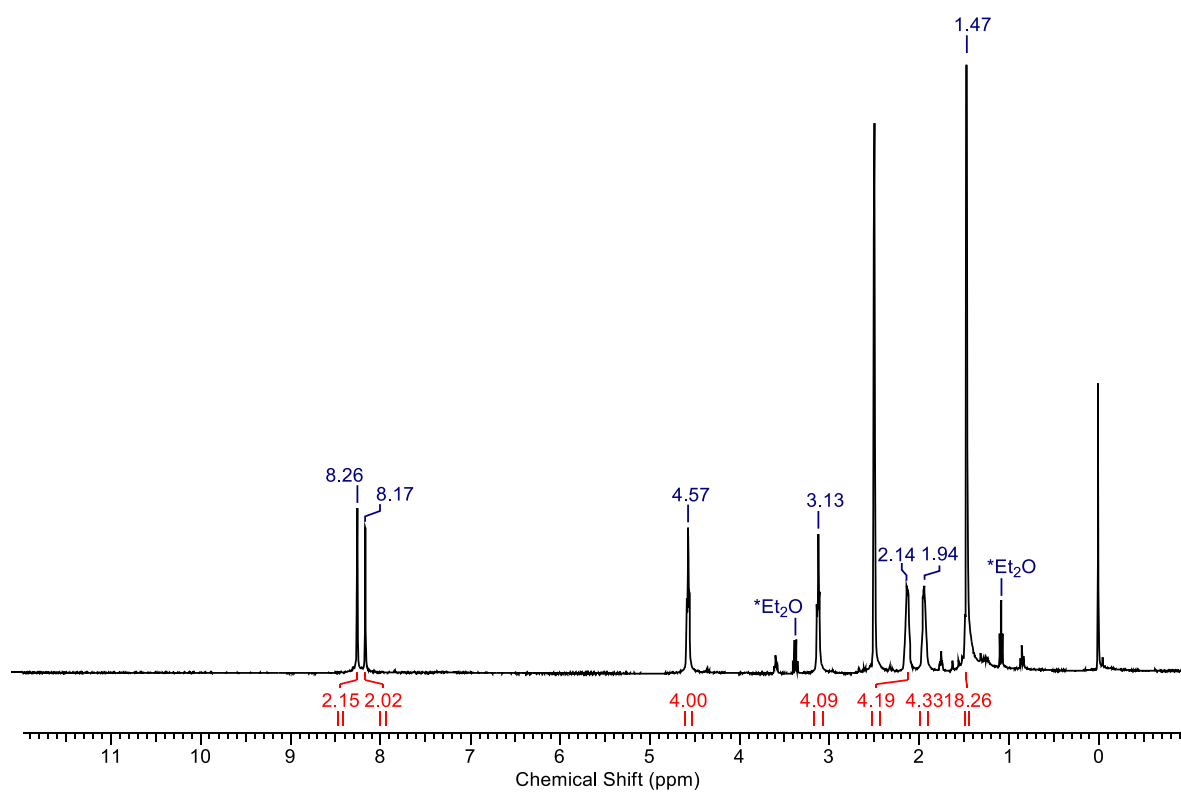

**Fig. S17**  $^1\text{H}$  NMR spectrum of compound **5**, measured in  $\text{DMSO-d}_6$ .

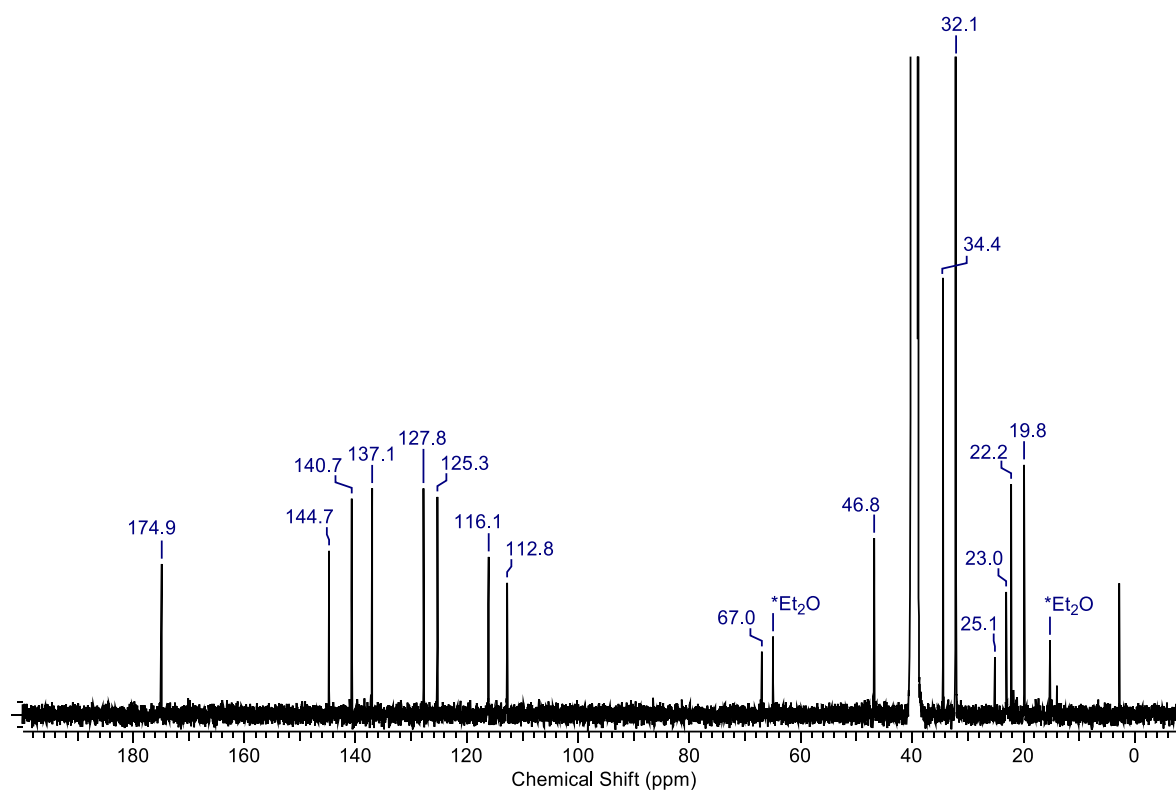

**Fig. S18**  $^{13}\text{C}$  NMR spectrum of compound **MgBr5**, measured in  $\text{DMSO-d}_6$ .

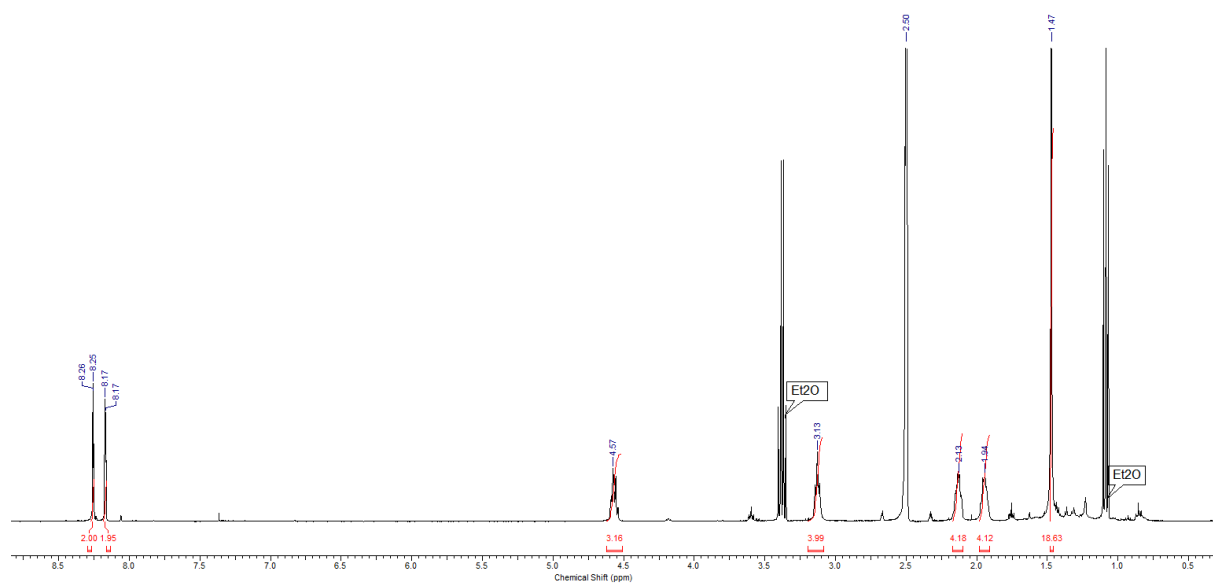

**Fig. S19** *In situ*  $^1\text{H}$  NMR spectrum of compound **MgBr5** obtained via the MeMgBr route, measured in  $\text{DMSO-d}_6$ .

## 2. Photospectroscopic Investigations

UV/vis absorption spectra between 300 and 1000 nm were recorded on a Lambda2 (PerkinElmer) dual beam absorption spectrometer with a scan rate of 480 nm/min and a resolution of 1 nm. Luminescence spectra were recorded on a Fluoromax-3 spectrometer (Horiba Yobin Yvon) with 1 nm spectral bandwidth and 0.1 s integration time, if not stated otherwise. Quantum yields ( $\Phi^{\text{em}}$ ) were obtained using Coumarin-102 ( $\Phi^{\text{em}} = 76\%$  in EtOH<sup>5</sup>) and Coumarin-151 ( $\Phi^{\text{em}} = 49\%$  in EtOH<sup>6</sup>). TCSPC experiments were measured with a FS5-TCSPC spectrofluorometer from Edinburgh Instruments equipped with a photomultiplier R928P emission detector. Samples were excited by a VISUV versatile picosecond laser module from Picoquant. The repetition rate was 8 MHz. All samples for photo spectroscopic investigations of the air- and moisture sensitive compounds **Li5**, **MgBr5**, and **4** were prepared in an argon-filled glovebox and hermetically sealed prior to the measurement. All glass containers (including vials and quartz glass cuvettes) were silylated prior to the transfer into the glovebox using standard procedures with dimethyldichlorosilane (DMDCS). Thereby, all glassware was soaked in a 10% DMDCS solution in toluene for 30 minutes and then rinsed twice with toluene. Subsequently, it was soaked in methanol for 15 minutes, rinsed twice with methanol and then finally dried in an oven at 160 °C for at least two hours before transferring them into the glovebox. Benzene for photo spectroscopic investigation was distilled over a NaK alloy and stored over a potassium mirror.

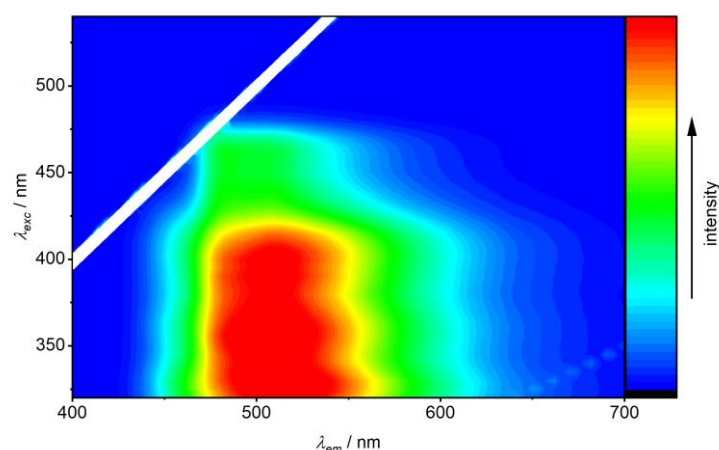

**Fig. S20** 3D steady-state fluorescence spectroscopy of **Li5** in benzene. The fluorescence intensity is depicted as color code. The white bar masks signals stemming from the scattered excitation light.

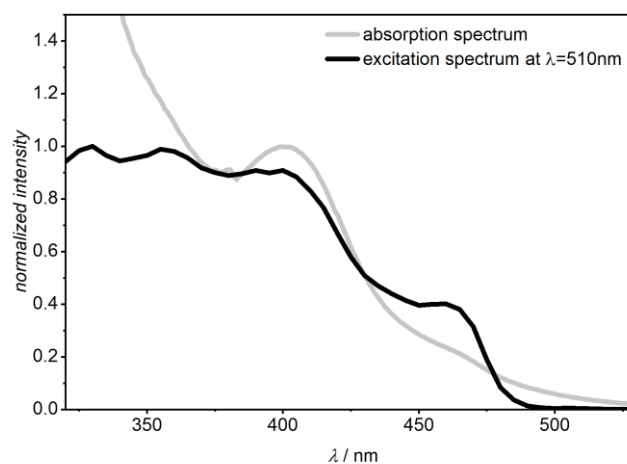

**Fig. S21** Comparison between the absorption spectrum of  $\text{Li5}$  (grey) and the excitation spectrum that leads to photoluminescence at 510 nm (black). The last absorption that leads to photoluminescence is located at the 460 nm shoulder and was used to determine the Stokes-shift of  $\text{Li5}$ . The spectra were measured in benzene.

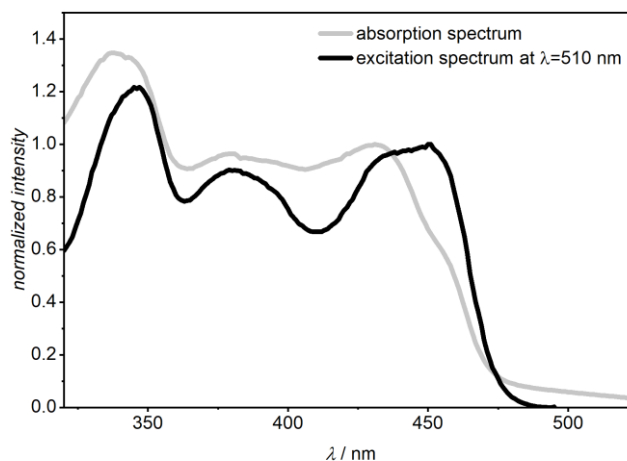

**Fig. S22** Comparison between the absorption spectrum of  $\text{MgBr5}$  (grey) and the excitation spectrum that leads to photoluminescence at 510 nm (black). The spectra were measured in benzene.

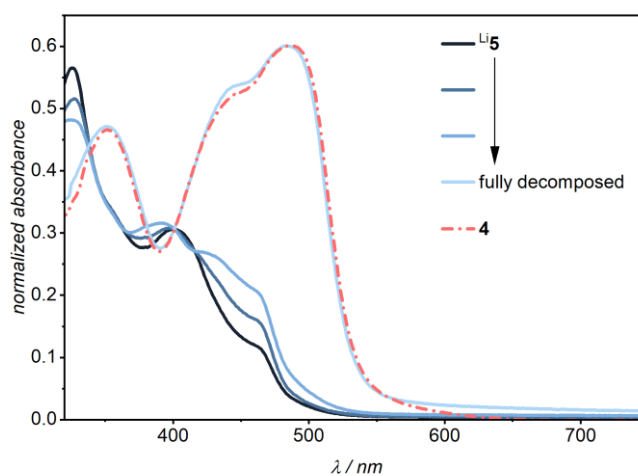

**Fig. S23** Normalized absorption spectra of  $\text{Li5}$  at different stages of decomposition compared to an absorption spectrum of **4** (light red). As dissolved (black), slightly decomposed (dark blue and blue), and fully decomposed (light blue) after exposure to air.

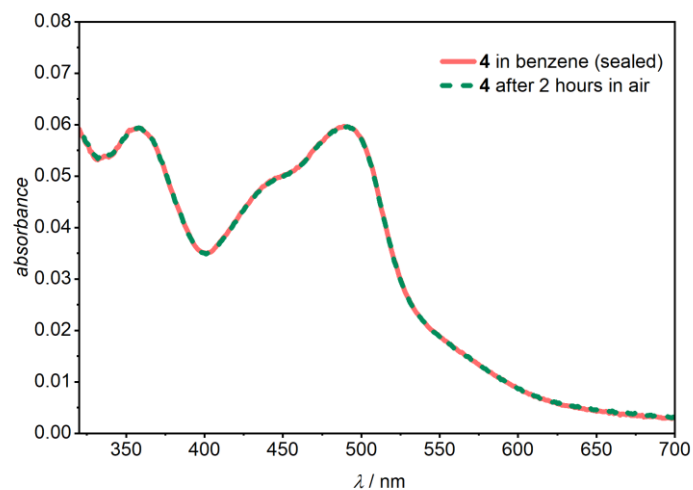

**Fig. S24** Comparison of absorption spectra of **4** in benzene in a sealed container (light red) and after 2 hours of exposure to air (green, dashed). Clearly, no spectral changes are discernible.

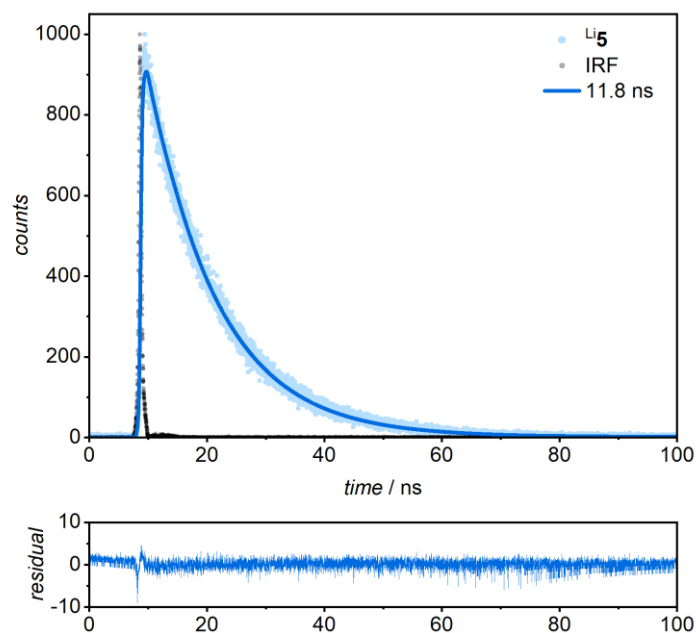

**Fig. S25** Top: Luminescence decay (bright blue dots) and fit (blue line) of  $\text{Li}^{\text{5}}$  in benzene ( $\lambda_{\text{em}} = 500 \text{ nm}$ ) obtained by time-correlated single-photon counting upon excitation at 355 nm, including the instrument response function (IRF, black dots). A mono-exponential fit was sufficient to fit the dataset (lifetime given in legend). Bottom: Corresponding residual to the TCSPC fit.



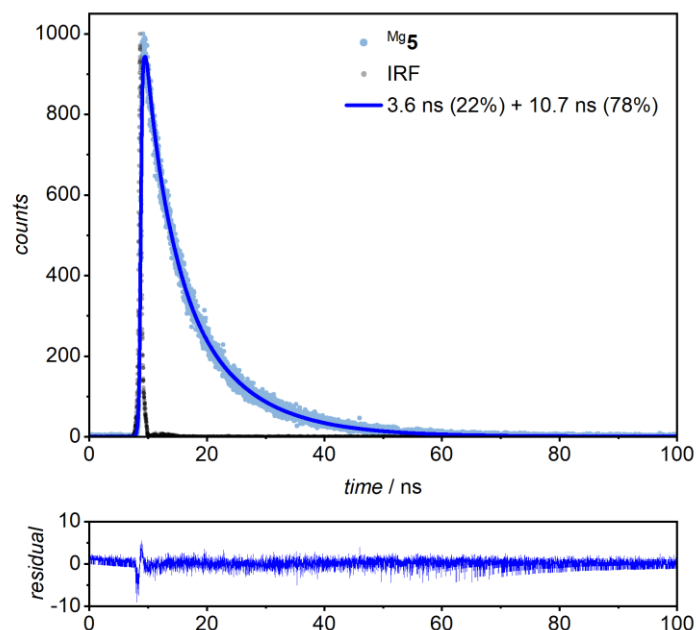

**Fig. S26** Top: Luminescence decay (blue dots) and fit (blue line) of  $\text{MgBr}_5$  in benzene ( $\lambda_{\text{em}} = 500 \text{ nm}$ ) obtained by time-correlated single-photon counting upon excitation at 355 nm, including the instrument response function (IRF, black dots). A bi-exponential fit was sufficient to fit the dataset (lifetimes and contribution given in legend). The second luminescent species is due to slight decomposition of the highly reactive compound during the time of the experiment and corresponds to the decomposition product. Bottom: Corresponding residual to the TCSPC fit.

### 3. Diffusion NMR (DOSY)

The diffusion NMR experiments (Bruker pulse sequence “ledbpgp2s”) were performed on a Bruker Avance III 300 instrument at a probe temperature of 22 °C. Deuterated benzene was used as solvent and an array of 16 runs (32 scans each; 1 s relaxation delay; 50 ms diffusion time) with a gradient pulse of 1.8 ms and the magnetic field gradient ranging from 10 mT m<sup>-1</sup> – 508 mT m<sup>-1</sup> was recorded. Each experiment was reproduced once and the values reported in Table S1 are averaged over these two runs.

#### Sample preparation:

- Complex  $\text{Li}5$  was suspended in benzene and filtered into a J-Young NMR tube to obtain a saturated solution. Note,  $\text{Li}5$  is only very moderately soluble in weakly-coordinating benzene; thus, only the singlet relating to the two *tert*-butyl substituents gives reliable integration.
- Complex  $\text{MgBr}5$  was also suspended in benzene and filtered in a J-Young NMR tube. As for  $\text{Li}5$ , the low solubility allowed for reliable integration of the *tert*-butyl signal only.
- As a reference for the monomer, we used the mono-deprotonated ligand **4**, which required the addition of a stoichiometric amount of NaBAr<sup>F</sup> to achieve sufficient solubility in benzene.

Further notes:

- Measuring <sup>MgBr</sup>5 and <sup>Li</sup>5 in one sample for direct comparison is not feasible due to anion scrambling.
- Measuring <sup>MgBr</sup>5 together with mono-deprotonated ligand **4** in the presence of NaBAr<sup>F</sup> also leads to shifts for <sup>MgBr</sup>5, which indicates exchange reactions; however both molecules showed the same drift properties which nevertheless suggests that both molecules are monomers.

**Table S1.** Diffusion coefficients  $D$  in [ $10^{-9} \text{ m}^2 \text{ s}^{-1}$ ].

|                       | $D^{\text{Li}5}$<br>(dimer)       | $D^{\text{MgBr}5}$<br>(monomer)   | $D^{\text{4}}$<br>(monomer)       |
|-----------------------|-----------------------------------|-----------------------------------|-----------------------------------|
| <b>1. Measurement</b> | $1.87 \pm 0.30$                   | $2.18 \pm 0.26$                   | $2.11 \pm 0.35$                   |
| <b>2. Measurement</b> | $1.59 \pm 0.40$                   | $2.31 \pm 0.35$                   | $2.17 \pm 0.3$                    |
| <b>Mean:</b>          | <b><math>1.73 \pm 0.35</math></b> | <b><math>2.25 \pm 0.31</math></b> | <b><math>2.14 \pm 0.33</math></b> |

The diffusion coefficient  $D$  is inversely related to the hydrodynamic radius  $R_0$  according to the Stokes-Einstein equation (Eq. S1):

$$D = \frac{k_b T}{6\pi \eta R_0} \quad (\text{Eq. S1})$$

The volume of a sphere with the corresponding hydrodynamic radius is calculated according to Eq. S2.

$$V = \frac{4}{3} R_0^3 \pi \quad (\text{Eq. S2})$$

This translates into the following volumes

**Table S2.** Calculated molecular volumes  $V$  (in  $10^{-38} \text{ m}^3$ ).

|              | $V^{\text{Li}5}$<br>(dimer) | $V^{\text{MgBr}5}$<br>(monomer) | $V^{\text{4}}$<br>(monomer) |
|--------------|-----------------------------|---------------------------------|-----------------------------|
| <b>Mean:</b> | <b>2.98</b>                 | <b>1.36</b>                     | <b>1.57</b>                 |

The volumes of <sup>MgBr</sup>5 and **4** are similar and the ratio between the volumes suggests that both are monomers (**4** seems to be a bit larger which is agreement with the presence of the bulky anion <sup>-</sup>BAr<sup>F</sup>). The relation of the volumes of <sup>MgBr</sup>5 or and <sup>Li</sup>5 confirms that <sup>MgBr</sup>5 is a monomer and <sup>Li</sup>5 a dimer in solution.

## 4. X-ray Single Crystal Structure Determinations

Intensity data of single crystals of the investigated compounds were collected using MoK $\alpha$  radiation ( $\lambda$  = 0.71073 Å) either on a Bruker D8 Quest diffractometer (**3** and **4**) or Bruker AXS D8 Venture, Photon II (**Li5**). All hydrogen atoms were placed in positions of optimized geometry. The isotropic displacement parameters of all hydrogen atoms were tied to those of their corresponding carrier atoms by a factor of 1.2 or 1.5. All non-hydrogen atoms were refined anisotropically. Data were corrected for Lorentz and polarization effects; semiempirical absorption corrections were performed on the basis of multiple scans using *SADABS*.<sup>7</sup> The structures were solved by direct methods using *SHELXT*.<sup>8</sup> The structures were refined by full-matrix least-squares procedures on  $F^2$  using *SHELXL* (compounds **3**, **4** and **Li5**) in the graphical user interface *Shelxle* (compound **3** **Li5**).<sup>9</sup> *OLEX2* was used to prepare material for publication.<sup>10</sup>

**Table S3:** Crystallographic details of compounds **3**, **4** and complex **Li5**.

|                                                                            | Compound <b>3</b>                                                                      | Compound <b>4</b>                                                                                  | Complex <b>Li5</b>                                                                            |
|----------------------------------------------------------------------------|----------------------------------------------------------------------------------------|----------------------------------------------------------------------------------------------------|-----------------------------------------------------------------------------------------------|
| Chemical Formula                                                           | C <sub>32</sub> H <sub>41</sub> N <sub>7</sub> I <sub>2</sub><br>4(CHCl <sub>3</sub> ) | C <sub>32</sub> H <sub>40</sub> N <sub>7</sub> I <sub>1</sub><br>3(C <sub>6</sub> H <sub>6</sub> ) | C <sub>80</sub> H <sub>116</sub> I <sub>4</sub> L <sub>6</sub> N <sub>14</sub> O <sub>4</sub> |
| $M_r$                                                                      | 1254.99                                                                                | 883.93                                                                                             | 1887.10                                                                                       |
| Crystal System                                                             | Orthorhombic                                                                           | Triclinic                                                                                          | Monoclinic                                                                                    |
| Space Group                                                                | <i>Pbcm</i>                                                                            | <i>P</i> -1                                                                                        | <i>P</i> 2 <sub>1</sub> / <i>n</i>                                                            |
| <i>a</i> (Å)                                                               | 12.486(2)                                                                              | 10.5612(6)                                                                                         | 14.6296(4)                                                                                    |
| <i>b</i> (Å)                                                               | 27.199(3)                                                                              | 15.8193(9)                                                                                         | 18.3265(4)                                                                                    |
| <i>c</i> (Å)                                                               | 13.881(2)                                                                              | 15.8498(8)                                                                                         | 16.3230(4)                                                                                    |
| $\alpha$ (°)                                                               | 90                                                                                     | 113.980(2)                                                                                         | 90                                                                                            |
| $\beta$ (°)                                                                | 90                                                                                     | 96.942(2)                                                                                          | 93.4710(10)                                                                                   |
| $\gamma$ (°)                                                               | 90                                                                                     | 105.305(2)                                                                                         | 90                                                                                            |
| <i>V</i> (Å <sup>3</sup> )                                                 | 4714(1)                                                                                | 2254.1(2)                                                                                          | 4368.32(19)                                                                                   |
| <i>Z</i>                                                                   | 4                                                                                      | 2                                                                                                  | 2                                                                                             |
| Density (g cm <sup>-3</sup> )                                              | 1.768                                                                                  | 1.302                                                                                              | 1.435                                                                                         |
| <i>F</i> (000)                                                             | 2480                                                                                   | 920                                                                                                | 1912                                                                                          |
| Radiation Type                                                             | MoK $\alpha$                                                                           | MoK $\alpha$                                                                                       | MoK $\alpha$                                                                                  |
| $\mu$ (mm <sup>-1</sup> )                                                  | 2.051                                                                                  | 0.752                                                                                              | 1.480                                                                                         |
| Crystal Size                                                               | 0.12x0.09x0.05                                                                         | 0.05x0.04x0.03                                                                                     | 0.17x0.14 x 0.10                                                                              |
| Meas. Refl.                                                                | 106086                                                                                 | 54094                                                                                              | 76358                                                                                         |
| Indep. Refl.                                                               | 4390                                                                                   | 8291                                                                                               | 10413                                                                                         |
| Obsvd. [ <i>I</i> > 2 $\sigma$ ( <i>I</i> )]                               | 3648                                                                                   | 5776                                                                                               | 9399                                                                                          |
| <i>R</i> <sub>int</sub>                                                    | 0.0597                                                                                 | 0.1527                                                                                             | 0.0328                                                                                        |
| Data / restraints / parameters                                             | 4390/1042/455                                                                          | 8291/529/14                                                                                        | 10413/114/583                                                                                 |
| <i>R</i> 1 [ <i>F</i> <sup>2</sup> > 2 $\sigma$ ( <i>F</i> <sup>2</sup> )] | 0.0462                                                                                 | 0.0536                                                                                             | 0.0202                                                                                        |
| w <i>R</i> 2( <i>F</i> <sup>2</sup> ) [all data]                           | 0.1350                                                                                 | 0.0978                                                                                             | 0.0478                                                                                        |
| <i>S</i>                                                                   | 1.052                                                                                  | 1.113                                                                                              | 1.038                                                                                         |
| $\Delta\rho_{\max}$                                                        | 1.608                                                                                  | 0.511                                                                                              | 0.491                                                                                         |
| $\Delta\rho_{\min}$                                                        | -1.117                                                                                 | -0.472                                                                                             | -0.482                                                                                        |
| CCDC                                                                       | 1953709                                                                                | 2047516                                                                                            | 2060428                                                                                       |

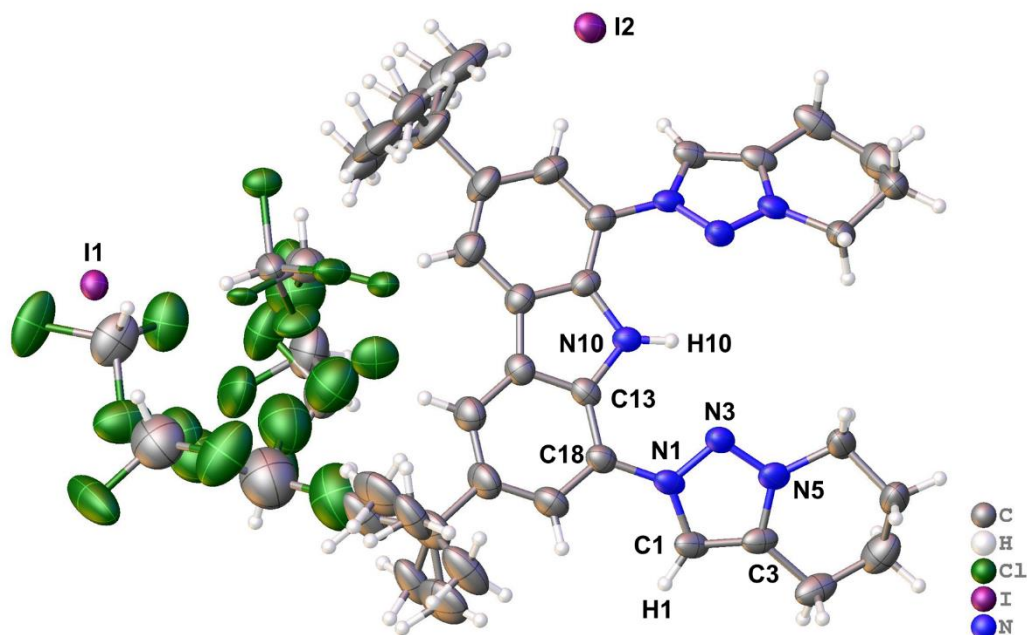

**Fig. S27** Solid-state structure of **3**, including the solvent molecules and the disorders with the applied numbering scheme on relevant atoms. Thermal ellipsoids are shown at the 50% probability level.

The tert-butyl group is disordered over two positions. The occupancy of the minor position refined to 0.458(8). The disordered chloroform molecules were refined on seven positions. Their occupancies were refined and then fixed to 0.12, 0.37, 0.43, 0.17, 0.45, 0.28 and 0.18, respectively. All disordered groups were refined with distance restraints and restraints or constraints for the anisotropic displacement parameters.

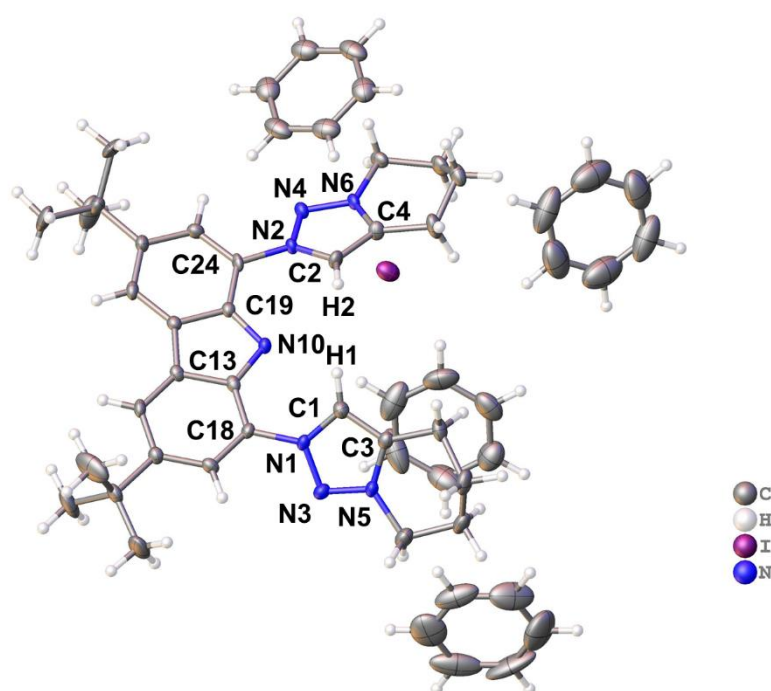

**Fig. S28** Solid-state structure of **4**, including the solvent molecules with the applied numbering scheme on relevant atoms. Thermal ellipsoids are shown at the 50% probability level.

The lattice benzene molecules were found to be strongly disordered and needed to be modeled using DFIX restraints fixing the bond distances of the carbon atoms.

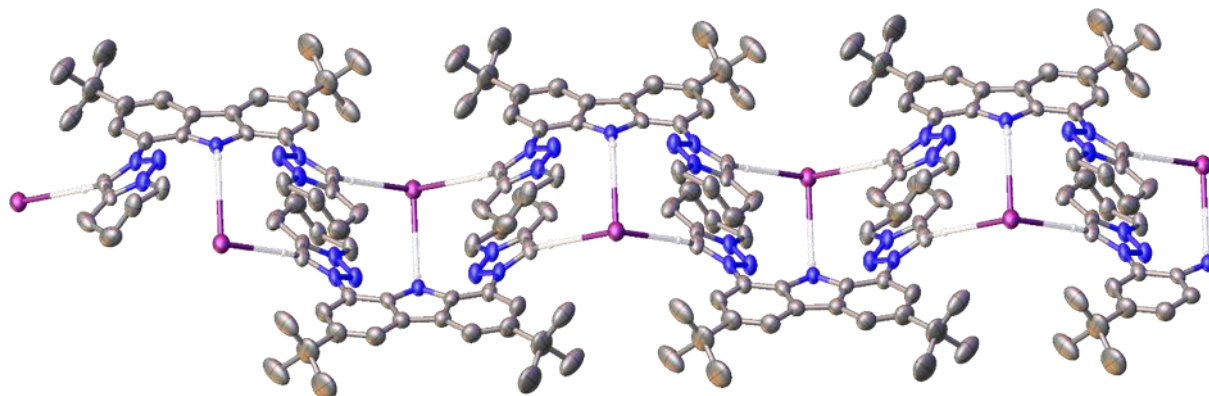

**Fig. S29** In the solid-state structure of **3** there are hydrogen bond-type interactions between H10–N3 (2.351(19) Å), H10–I2 (3.08 (7) Å) and H1–I2 (2.83(1) Å).

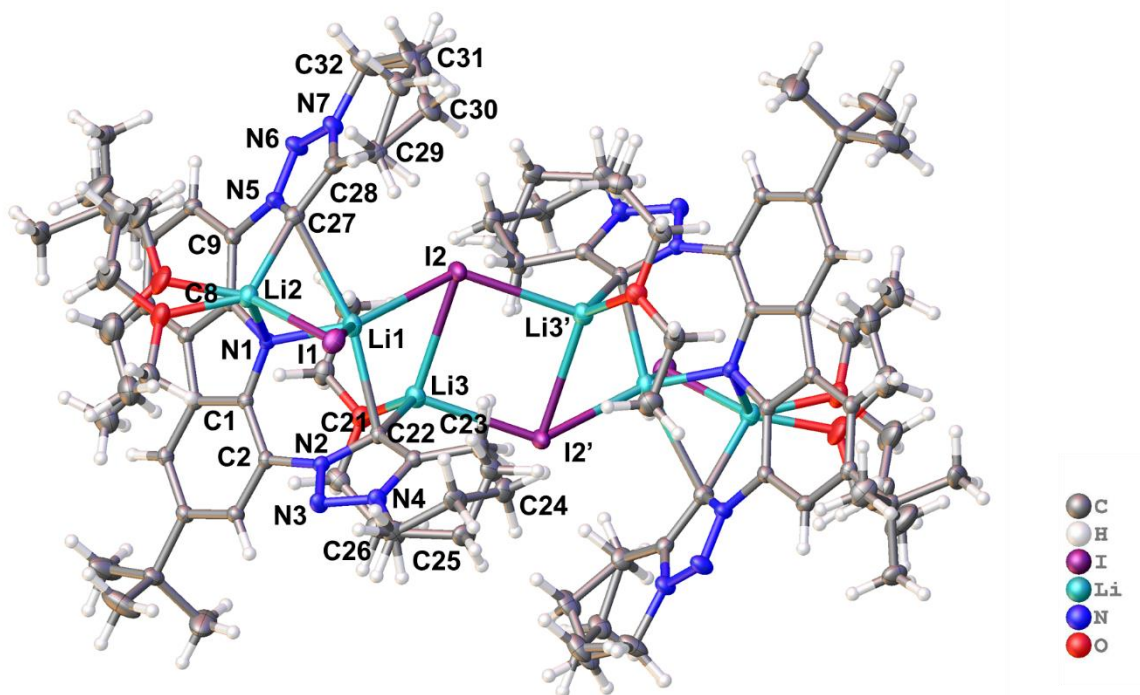

**Fig. S30** Solid-state structure of **5** including structural disorders, with the applied numbering scheme on relevant atoms. Thermal ellipsoids are shown at the 50% probability level.

The coordinated diethyl ether on Li2 is disordered over two positions. Its occupancy factors refined to 88.8 % (A) and 11.2 % (B). Additionally, C24, C25 and C30, C31 of the six-membered rings were split over two positions. The occupancy factors of their major position refined to 69.7 % and 90.1 %, respectively. For the refinement of the disorder distance restraints and restraints for the anisotropic displacement parameters were applied.

## 5. Computational Details – General

The calculations were performed with ORCA 4.2.1.<sup>11, 12</sup> All calculated structures were verified as true minima by the absence of negative eigenvalues in the harmonic vibrational frequency analysis. Potential conformers were assessed for all structures, but only the most stable ones are given below. Tighter than default convergence criteria (tightopt), grid values (grid5, finalgrid6) were chosen for both the optimization of the structural parameters and the scf (tightscf). The geometry optimizations were performed at the B3LYP-D3(BJ)/def2-SVP level of theory.<sup>13-18</sup> The RIJCOSX approximation (gridx5) and the related auxiliary basis set def2/J were used to speed up the calculations.<sup>19-21</sup> The absorption spectra were initially modelled by time-dependent DFT (TD-DFT) as single point calculations at the triple- $\zeta$  level of theory (BP86<sup>22, 23</sup>, B3LYP<sup>13-16</sup>, cam-B3LYP<sup>24</sup>, M06-2X<sup>25</sup>, TPSS<sup>26</sup>, TPSSH<sup>27</sup>,  $\omega$ B97XD<sup>28</sup>, Figs. S30-S32) using the structural parameters obtained from the B3LYP-D3(BJ)/def2-SVP calculations. The geometry optimizations of the excited  $S_1$  states were performed at the TD-DFT B3LYP-D3(BJ)/def2-SVP level of theory.<sup>13-18, 29</sup> The vibronically resolved spectrum was obtained with the ESD<sup>30, 31</sup> module as implemented in ORCA 4.2.1 at the B3LYP-D3(BJ)/def2-TZVPP//B3LYP-D3(BJ)/def2-SVP level of theory with the adiabatic hessian model (hessflag AH).<sup>13-18, 29</sup> The DLPNO-STEOM-CCSD calculations were performed using the def2-TZVPP basis set and the def2-TZVPP/C auxiliary basis set using the structural parameters obtained from the B3LYP-D3(BJ)/def2-SVP calculations.<sup>21, 29, 32</sup> Ten (compounds **5**) to twenty (compounds **3**, **4**) roots were included in the calculations. For the DLPNO-STEOM-CCSD calculation, correction for solvation effects was performed using the SMD model (SMD true and smdsolvent "benzene").<sup>33</sup> Molecular orbitals and optimized geometries were visualized with Chemcraft, IBOView and Avogadro.<sup>34, 35</sup>

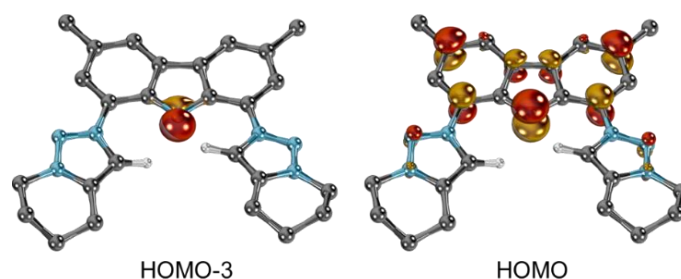

**Fig. S31** Relevant molecular orbitals as obtained at DFT B3LYP-D3(BJ)/def2-TZVPP level of theory show that compound **4** contains a "naked" amide.

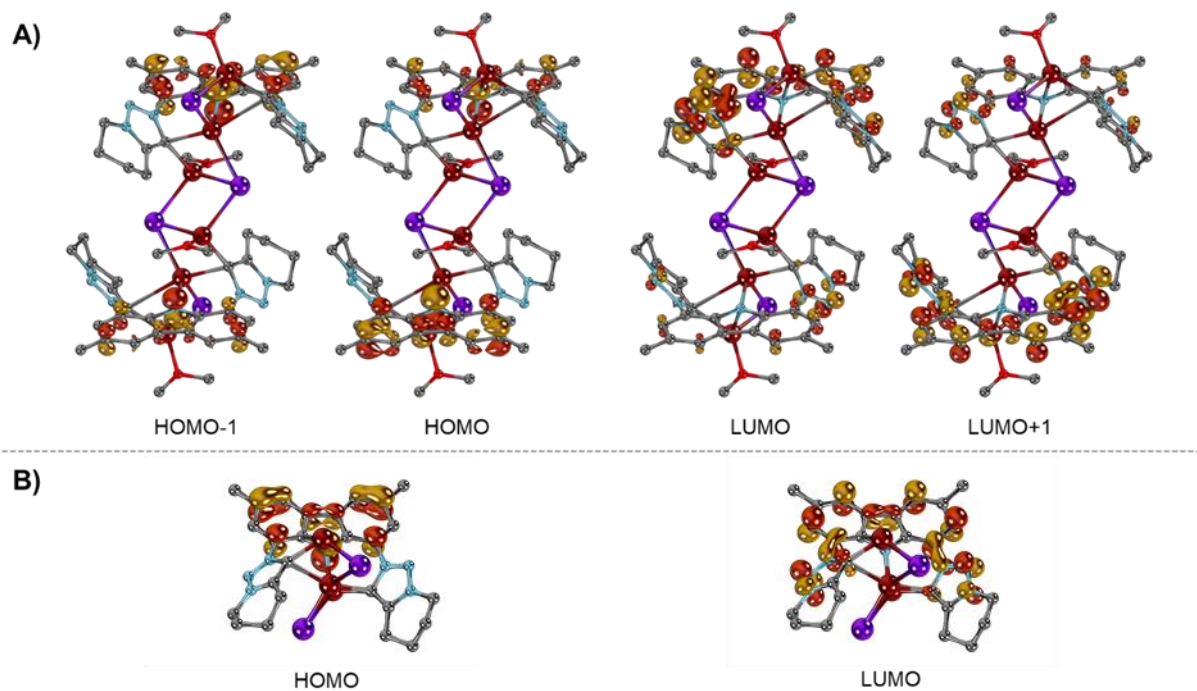

**Fig. S32** **A)** The bright absorption to the  $S_1$  state of  $Li5$  is approximated as the  $HOMO \rightarrow LUMO$  transition. Note that the HOMO and HOMO-1 are degenerate due to symmetry (top left), the same holds true for LUMO and LUMO+1 (top right). The HOMO (HOMO-1) is located at the carbazole, whereas the LUMO (LUMO+1) is mainly localized on one of the two CNC ligands in the triazolium groups. **B)** The electronic structure of  $Li5^{truncated}$  is equivalent to  $Li5$ . Hydrogen atoms are omitted for clarity. Results obtained at the TD-DFT B3LYP-D3(BJ)(SMD)/def2-TZVPP//B3LYP-D3(BJ)/def2-SVP level of theory.



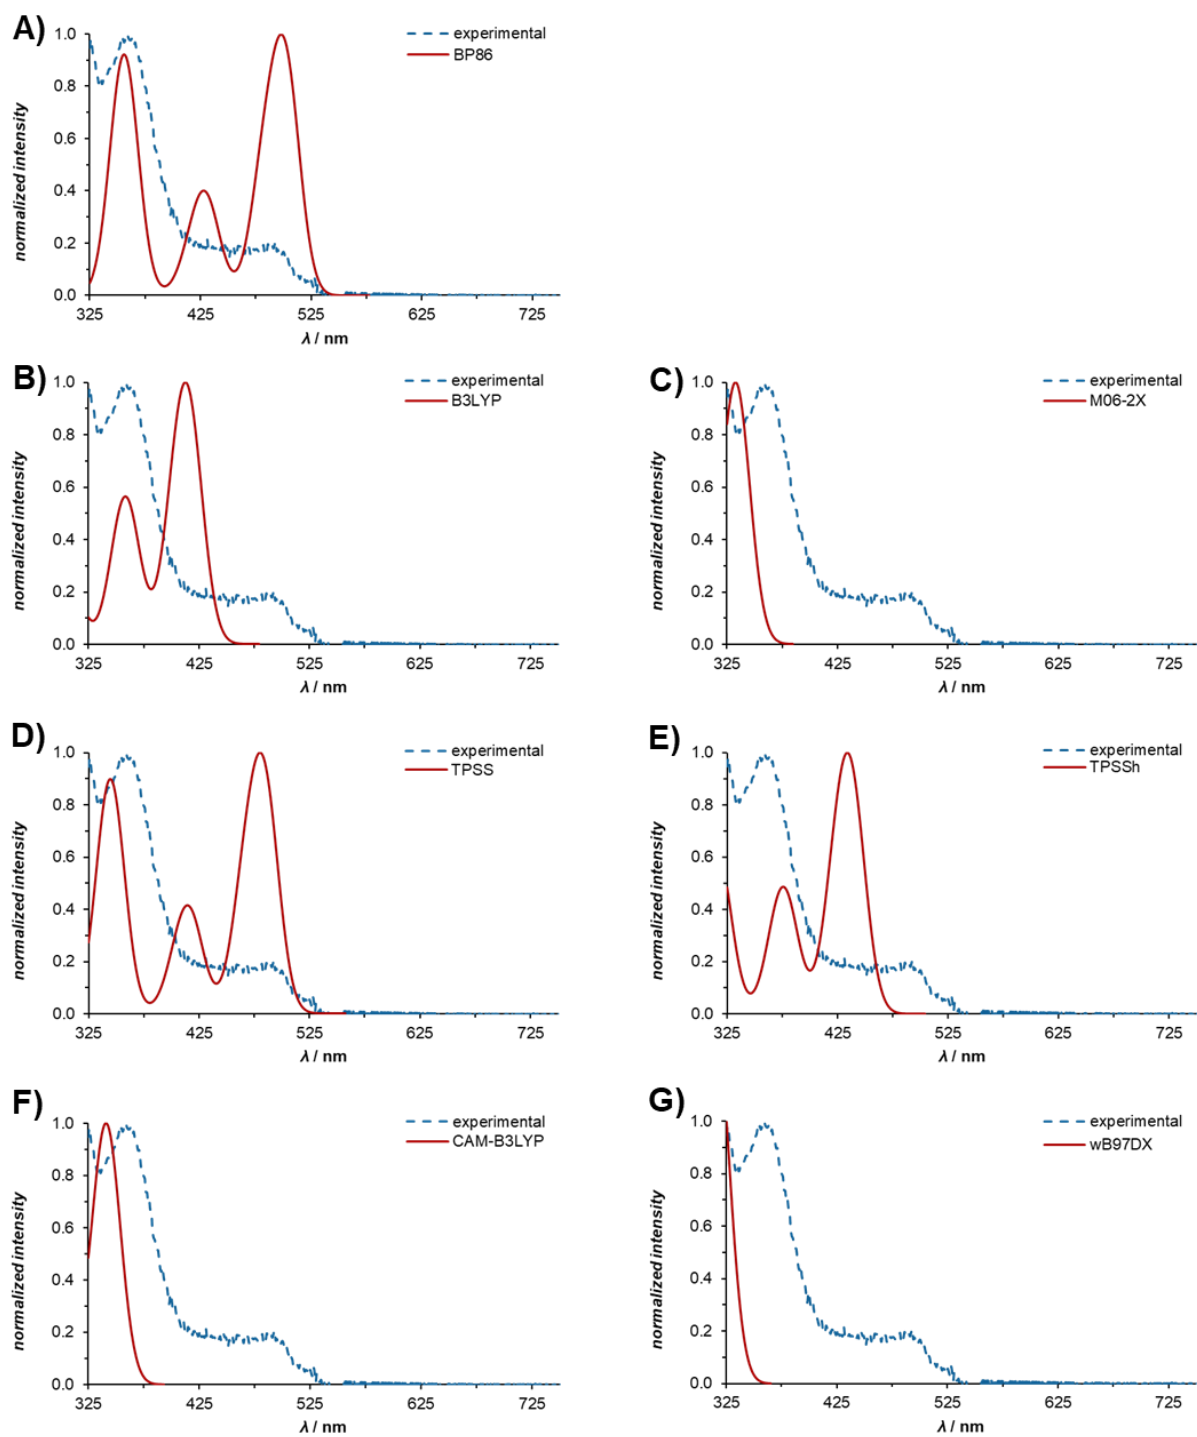

**Fig. S33** Predicted absorption spectrum of compound **3** obtained with different DFT functionals **A)** BP86, **B)** B3LYP, **C)** M06-2X, **D)** TPSS, **E)** TPSSH, **F)** cam-B3LYP, **G)**  $\omega$ B97DX. Results obtained at the TD-DFT (SMD)/def2-TZVPP//B3LYP-D3(BJ)/def2-SVP level of theory.



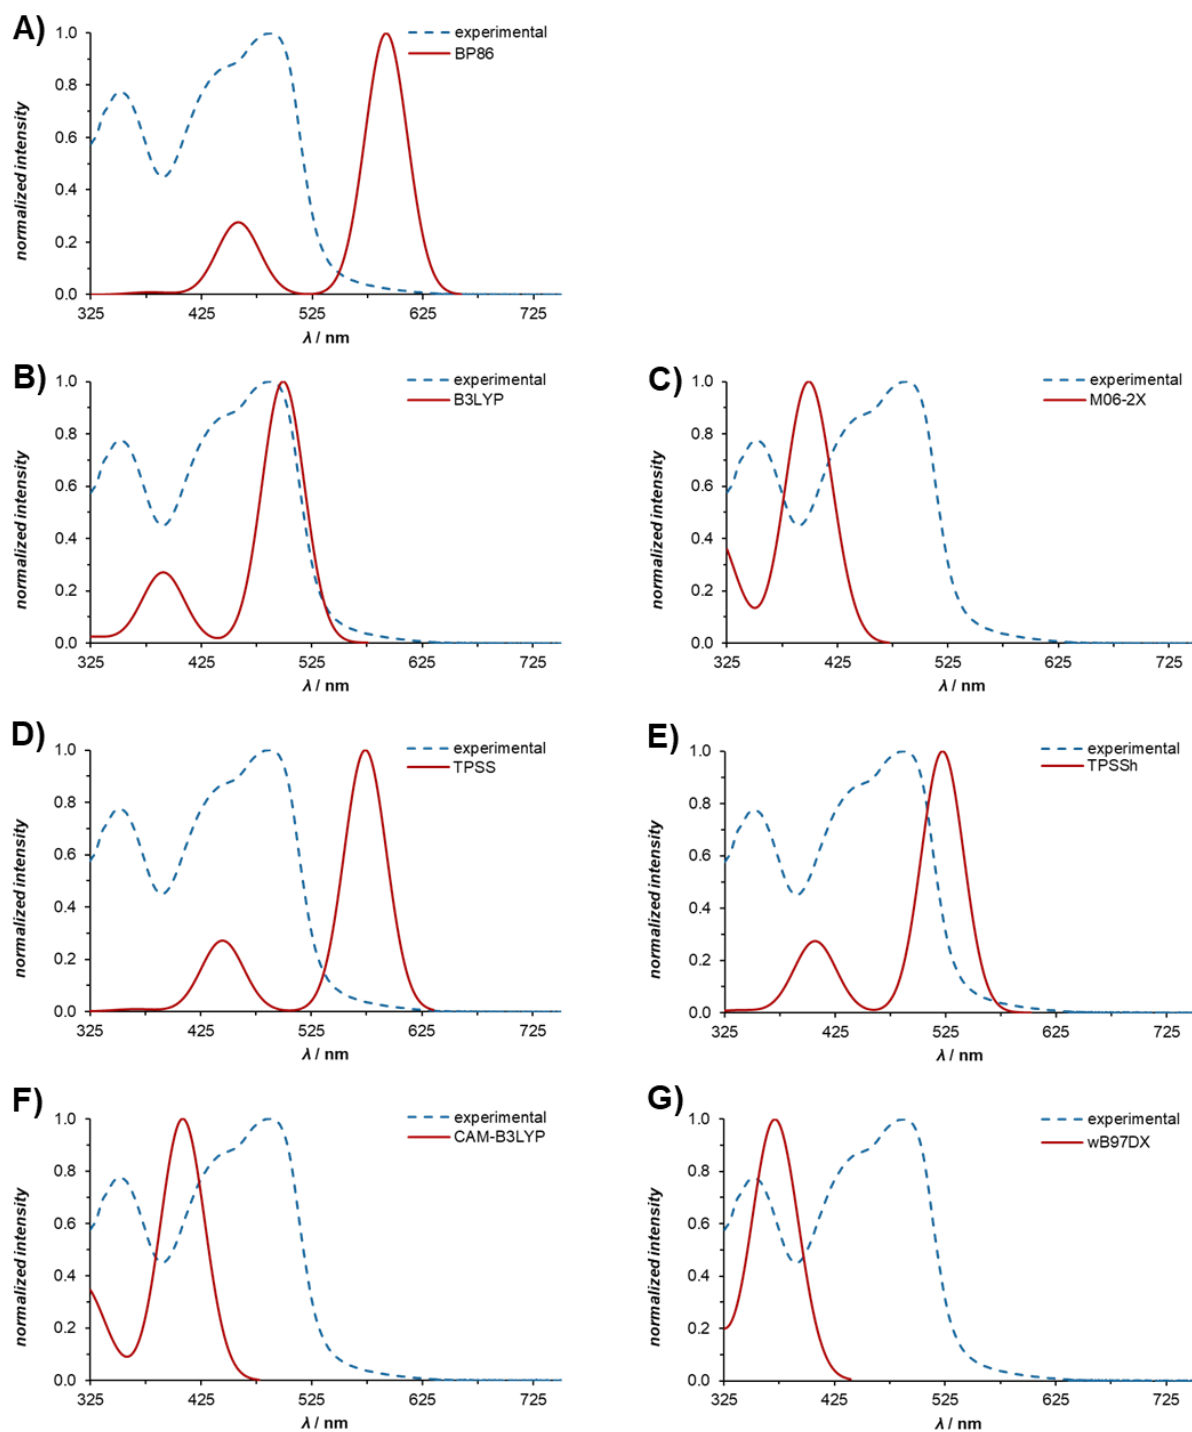

**Fig. S34** Predicted absorption spectrum of compound **4** obtained with different DFT functionals **A)** BP86, **B)** B3LYP, **C)** M06-2X, **D)** TPSS, **E)** TPSSH, **F)** cam-B3LYP, **G)**  $\omega$ B97XD. Results obtained at the TD-DFT (SMD)/def2-TZVPP//B3LYP-D3(BJ)/def2-SVP level of theory.

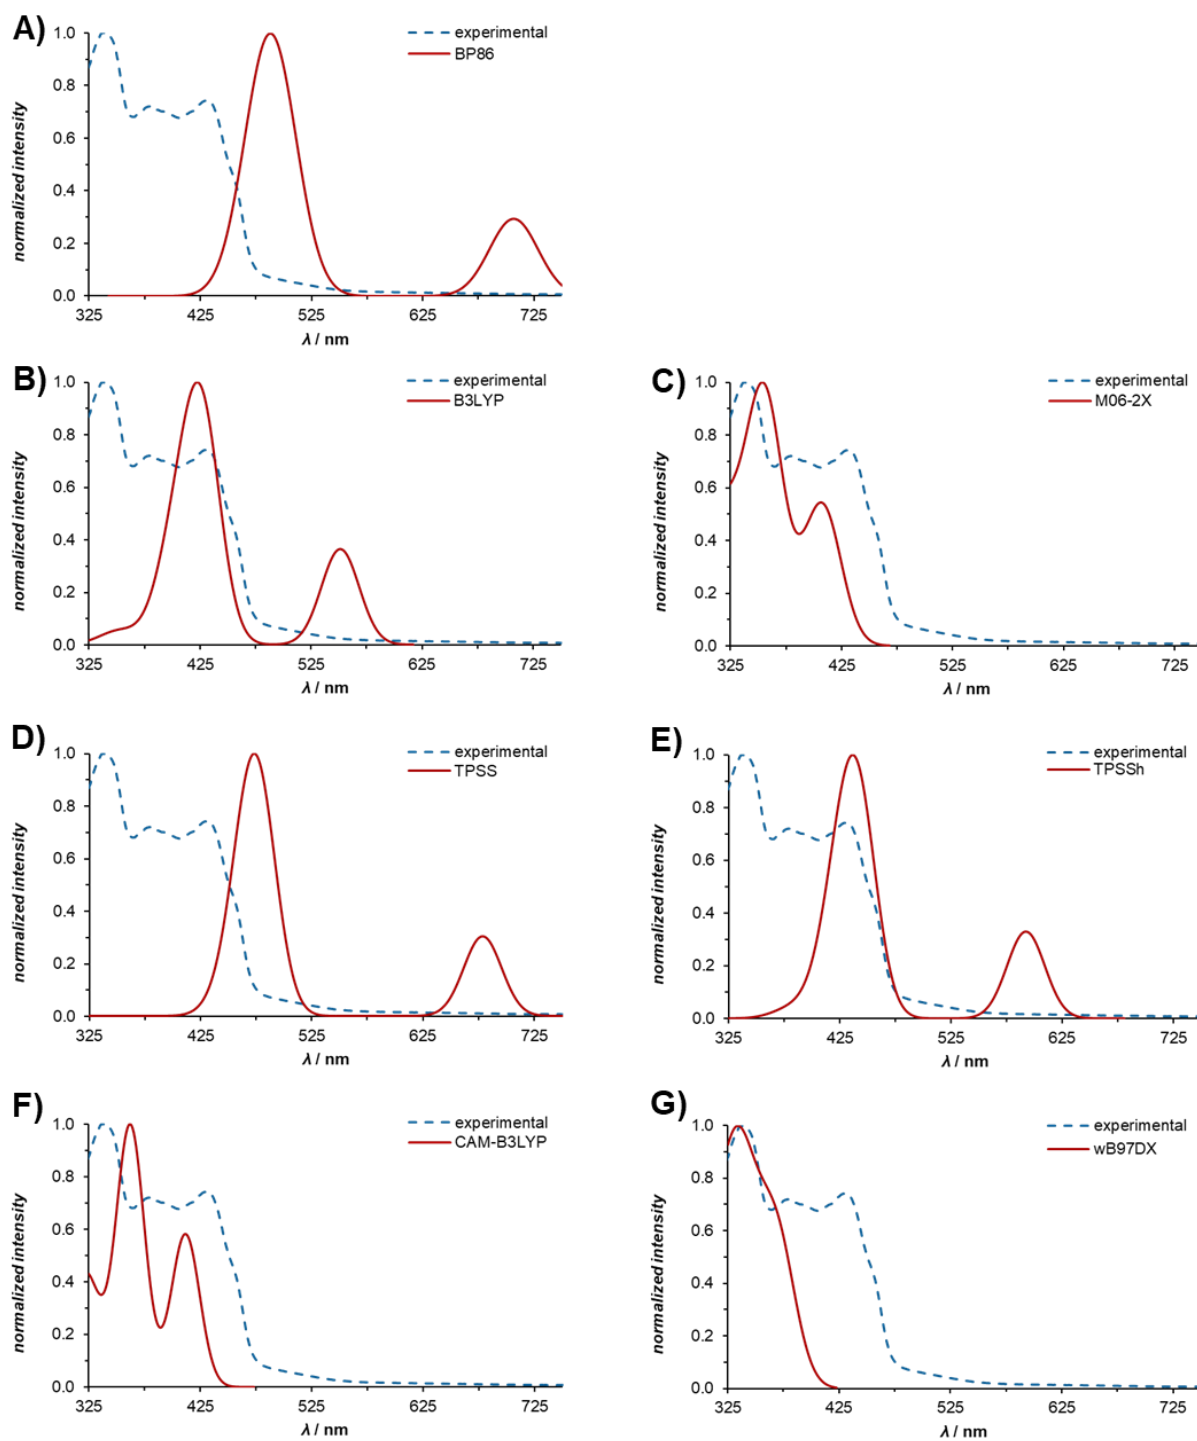

**Fig. S35** Predicted absorption spectrum of compound  $\text{MgBr}_5$  obtained with different DFT functionals **A)** BP86, **B)** B3LYP, **C)** M06-2X, **D)** TPSS, **E)** TPSSH, **F)** cam-B3LYP, **G)**  $\omega$ B97XD. Results obtained at the TD-DFT (SMD)/def2-TZVPP//B3LYP-D3(BJ)/def2-SVP level of theory.

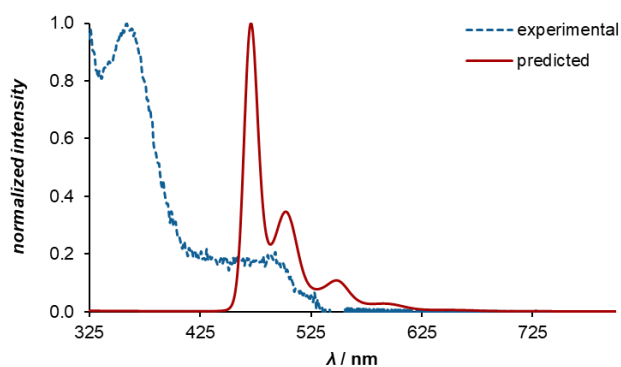

**Fig. S36** Molecular vibrations are responsible for the plateau in the absorption spectrum of **3**. The vibronically resolved spectrum has been obtained at the B3LYP Def2-TZVPP level of theory.

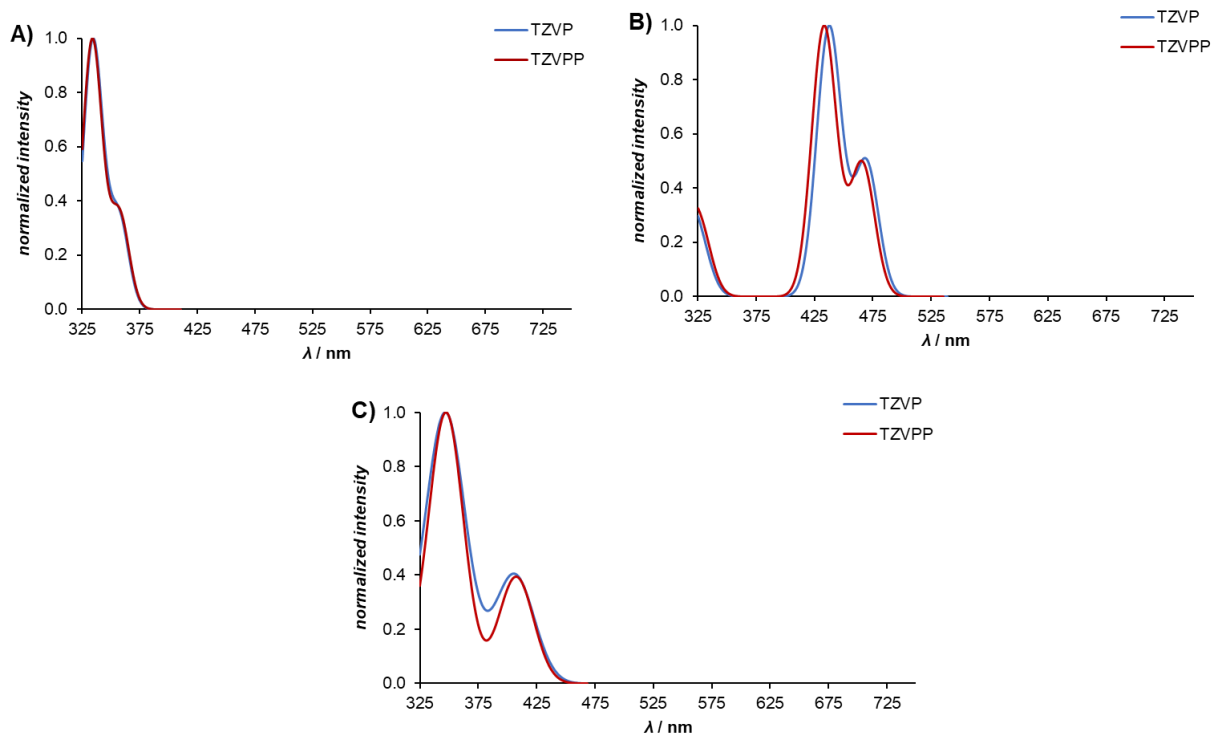

**Fig. S37** The basis set def2-TZVP (blue) and def2-TZVPP (red) give comparable results for compounds **3** (A), **4** (B) and  $\text{MgBr}_5$  (C). Results obtained at the DLPNO-STEOM-CCSD(SMD= $\text{C}_6\text{H}_6$ )/def2-TZVP (or def2-TZVP) //B3LYP-D3(BJ)/def2-SVP level of theory.

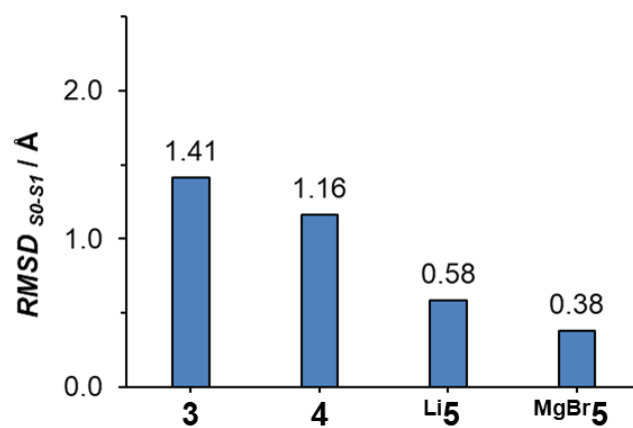

**Fig. S38** Structural distortion arising from the excitation process is quantified by the root-mean-square deviation for the change of all the atomic positions. Results obtained at the TD-DFT B3LYP-D3(BJ)(SMD)/def2-TZVPP//B3LYP-D3(BJ)/def2-SVP level of theory.

## 6. XYZ Coordinates

### Compound 3 Ground State ( $S_0$ )

|   |          |          |          |
|---|----------|----------|----------|
| C | -6.69740 | 1.79207  | 5.09392  |
| C | -5.77400 | 2.69552  | 5.63615  |
| C | -4.44385 | 2.76991  | 5.19111  |
| C | -4.01420 | 1.89356  | 4.18067  |
| C | -4.94962 | 0.97411  | 3.62214  |
| C | -6.26839 | 0.92776  | 4.07068  |
| H | -6.11841 | 3.35220  | 6.43389  |
| H | -6.97356 | 0.21956  | 3.62887  |
| C | -2.89126 | 0.71336  | 2.61921  |
| C | -1.94724 | 0.13245  | 1.75600  |
| C | -2.35995 | -0.87571 | 0.86922  |
| C | -3.68224 | -1.34103 | 0.83349  |
| C | -4.61230 | -0.78983 | 1.73084  |
| C | -4.22806 | 0.22247  | 2.60834  |
| H | -1.64396 | -1.30892 | 0.17007  |
| H | -5.64139 | -1.15718 | 1.73135  |
| C | -8.12114 | 1.75983  | 5.58625  |
| H | -8.81692 | 2.06753  | 4.78865  |
| H | -8.41249 | 0.74504  | 5.90034  |
| H | -8.27431 | 2.43503  | 6.43948  |
| C | -4.11216 | -2.39097 | -0.15762 |
| H | -4.72487 | -3.16522 | 0.32913  |
| H | -4.72678 | -1.93988 | -0.95453 |
| H | -3.25486 | -2.88467 | -0.63715 |
| C | -3.88435 | 4.68599  | 6.70613  |
| C | -2.71113 | 5.36054  | 6.97353  |
| C | 0.49185  | -0.14925 | 1.24335  |
| C | 1.60790  | 0.60449  | 1.54864  |
| N | -3.56805 | 3.73388  | 5.77376  |
| N | -2.28996 | 3.78196  | 5.44353  |
| N | -1.78581 | 4.76123  | 6.17113  |
| N | -0.57338 | 0.51903  | 1.78565  |
| N | -0.19394 | 1.62281  | 2.40167  |
| N | 1.11648  | 1.66189  | 2.25767  |
| C | 3.07089  | 0.43272  | 1.28816  |
| H | 3.44604  | -0.35523 | 1.96451  |
| H | 3.22005  | 0.05576  | 0.26501  |
| C | 3.83049  | 1.74436  | 1.53164  |
| H | 3.65598  | 2.44165  | 0.69461  |
| H | 4.90968  | 1.53852  | 1.55201  |
| C | 3.38209  | 2.39284  | 2.84674  |
| H | 3.97128  | 3.29602  | 3.06342  |
| H | 3.54683  | 1.69860  | 3.68836  |
| C | 1.90786  | 2.79140  | 2.78069  |
| H | 1.74930  | 3.64101  | 2.09761  |
| H | 1.49070  | 3.05536  | 3.76250  |
| C | -2.35794 | 6.45376  | 7.92987  |
| H | -3.13437 | 7.23324  | 7.89428  |
| H | -2.39456 | 6.02550  | 8.94756  |
| C | -0.96451 | 7.03206  | 7.63751  |

|   |          |          |         |
|---|----------|----------|---------|
| H | -0.62492 | 7.61535  | 8.50460 |
| H | -1.02151 | 7.73463  | 6.78902 |
| C | 0.04138  | 5.92172  | 7.31694 |
| H | 0.12709  | 5.22228  | 8.16582 |
| H | 1.04248  | 6.34615  | 7.14922 |
| C | -0.36941 | 5.15307  | 6.06045 |
| H | 0.20963  | 4.23044  | 5.91581 |
| H | -0.26755 | 5.77584  | 5.15728 |
| N | -2.78980 | 1.71764  | 3.56431 |
| H | -4.87923 | 4.82348  | 7.11336 |
| H | 0.40018  | -1.09431 | 0.71959 |
| H | -1.95965 | 2.26538  | 3.74667 |

### Compound 3 Excited State ( $S_1$ )

|   |          |          |         |
|---|----------|----------|---------|
| C | -7.29760 | 3.21954  | 3.39760 |
| C | -6.36739 | 4.25696  | 3.55976 |
| C | -4.99546 | 3.99512  | 3.67940 |
| C | -4.54284 | 2.67320  | 3.65499 |
| C | -5.47623 | 1.60895  | 3.48998 |
| C | -6.83016 | 1.87849  | 3.36205 |
| H | -6.70674 | 5.29333  | 3.58412 |
| H | -7.54726 | 1.06353  | 3.23822 |
| C | -3.33721 | 0.77288  | 3.69249 |
| C | -2.26763 | -0.14641 | 3.80566 |
| C | -2.59300 | -1.47494 | 3.80792 |
| C | -3.95177 | -1.92382 | 3.60608 |
| C | -5.00039 | -0.98627 | 3.48338 |
| C | -4.69637 | 0.36805  | 3.52982 |
| H | -1.80682 | -2.22318 | 3.92002 |
| H | -6.02601 | -1.33633 | 3.35424 |
| C | -8.76225 | 3.50482  | 3.24058 |
| H | -9.10826 | 3.19841  | 2.23848 |
| H | -9.35338 | 2.92819  | 3.97042 |
| H | -8.99286 | 4.57037  | 3.37035 |
| C | -4.20858 | -3.38716 | 3.50338 |
| H | -5.27422 | -3.62288 | 3.38891 |
| H | -3.66045 | -3.81576 | 2.64394 |
| H | -3.81730 | -3.90782 | 4.39557 |
| C | -2.92262 | 5.30826  | 3.11032 |
| C | -2.43578 | 6.51912  | 3.56691 |
| C | 0.22312  | -0.37268 | 3.83945 |
| C | 0.97866  | -0.14008 | 4.94211 |
| N | -4.07602 | 5.08737  | 3.81539 |
| N | -4.33510 | 6.06113  | 4.66248 |
| N | -3.35375 | 6.91293  | 4.50456 |
| N | -0.95021 | 0.41299  | 3.95963 |
| N | -0.93429 | 1.08489  | 5.20494 |
| N | 0.24331  | 0.71072  | 5.75083 |
| C | 2.32430  | -0.63451 | 5.38240 |
| H | 2.21046  | -1.66460 | 5.76213 |

|   |          |          |         |
|---|----------|----------|---------|
| H | 2.99596  | -0.69505 | 4.51359 |
| C | 2.90383  | 0.25444  | 6.49144 |
| H | 3.22891  | 1.22224  | 6.07088 |
| H | 3.79895  | -0.22336 | 6.91424 |
| C | 1.85588  | 0.48961  | 7.58299 |
| H | 2.27901  | 1.05851  | 8.42386 |
| H | 1.52295  | -0.48006 | 7.99112 |
| C | 0.65425  | 1.25941  | 7.03580 |
| H | 0.90810  | 2.32462  | 6.88963 |
| H | -0.21038 | 1.21270  | 7.71505 |
| C | -1.25928 | 7.37064  | 3.20567 |
| H | -0.37958 | 6.72969  | 3.04411 |
| H | -1.47707 | 7.84851  | 2.23407 |
| C | -0.99874 | 8.44150  | 4.27655 |
| H | -0.28597 | 9.17836  | 3.88183 |
| H | -0.52238 | 7.98200  | 5.15945 |
| C | -2.30488 | 9.12849  | 4.68847 |
| H | -2.78122 | 9.60052  | 3.81237 |
| H | -2.11452 | 9.93241  | 5.41440 |
| C | -3.27131 | 8.13831  | 5.33344 |
| H | -4.29288 | 8.52914  | 5.43015 |
| H | -2.92547 | 7.82013  | 6.32949 |
| N | -3.26728 | 2.13011  | 3.76723 |
| H | -2.56936 | 4.63620  | 2.33234 |
| H | 0.43362  | -0.96434 | 2.95418 |
| H | -2.41896 | 2.59119  | 4.09622 |

#### Compound 4 Ground State ( $S_0$ )

|   |          |          |          |
|---|----------|----------|----------|
| N | 1.53514  | 0.75769  | 9.81420  |
| N | 3.53411  | 0.15550  | 13.62883 |
| N | 3.47360  | 1.30680  | 14.26996 |
| N | -0.51965 | 3.37097  | 7.03148  |
| N | 2.89897  | 0.36807  | 12.49093 |
| N | -0.31990 | 4.60385  | 7.45672  |
| N | 0.19268  | 2.61373  | 7.84445  |
| C | 0.94619  | 0.41179  | 8.62727  |
| C | 1.06142  | -0.99483 | 8.33698  |
| C | 1.81473  | -1.53542 | 9.44766  |
| C | 0.49089  | -1.55851 | 7.20317  |
| H | 0.59444  | -2.63032 | 7.01015  |
| C | 0.26459  | 1.20600  | 7.67513  |
| C | 2.04512  | -0.40883 | 10.31749 |
| C | -0.22952 | -0.75654 | 6.29425  |
| C | 0.50697  | 4.66910  | 8.54009  |
| C | -0.31992 | 0.61727  | 6.53939  |
| H | -0.84656 | 1.25711  | 5.83116  |
| C | 0.84832  | 3.35643  | 8.79590  |
| H | 1.48013  | 2.84785  | 9.52071  |
| C | 2.43525  | 1.65705  | 12.39597 |
| H | 1.87102  | 1.95164  | 11.51364 |
| C | 2.72440  | -0.66715 | 11.53273 |
| C | 2.28324  | -2.80506 | 9.75439  |

|   |          |          |          |
|---|----------|----------|----------|
| H | 2.09409  | -3.63977 | 9.07360  |
| C | 3.66052  | 2.75973  | 16.23964 |
| H | 4.33187  | 2.96478  | 17.08627 |
| H | 2.64763  | 2.64147  | 16.66115 |
| C | 2.82134  | 2.27756  | 13.56785 |
| C | 4.10229  | 1.44965  | 15.58879 |
| H | 5.19339  | 1.41712  | 15.44088 |
| H | 3.81227  | 0.57261  | 16.18438 |
| C | 3.19832  | -1.95925 | 11.82311 |
| H | 3.72364  | -2.12184 | 12.76405 |
| C | 3.00468  | -3.02986 | 10.94411 |
| C | 0.81531  | 5.97250  | 9.20918  |
| H | 1.85900  | 5.97237  | 9.55884  |
| H | 0.18410  | 6.05319  | 10.11201 |
| C | 3.66745  | 3.92248  | 15.24121 |
| H | 3.41384  | 4.86251  | 15.75225 |
| H | 4.67794  | 4.04942  | 14.81491 |
| C | -0.84124 | 6.99461  | 7.60002  |
| H | -1.63068 | 6.93711  | 8.36918  |
| H | -1.07910 | 7.86297  | 6.96770  |
| C | -0.88130 | 5.74463  | 6.72203  |
| H | -1.89887 | 5.47015  | 6.41142  |
| H | -0.27416 | 5.87818  | 5.81201  |
| C | 2.65979  | 3.66375  | 14.11249 |
| H | 1.63126  | 3.78271  | 14.49799 |
| H | 2.77848  | 4.38919  | 13.29299 |
| C | 0.52918  | 7.15608  | 8.27190  |
| H | 1.31450  | 7.21990  | 7.49904  |
| H | 0.57264  | 8.09387  | 8.84484  |
| C | -0.88082 | -1.37868 | 5.08345  |
| H | -0.14503 | -1.91957 | 4.46505  |
| H | -1.64922 | -2.11143 | 5.38126  |
| H | -1.36773 | -0.62420 | 4.44822  |
| C | 3.54411  | -4.40513 | 11.24994 |
| H | 3.99242  | -4.45510 | 12.25313 |
| H | 2.74982  | -5.16713 | 11.19082 |
| H | 4.32189  | -4.69651 | 10.52457 |

#### Compound 4 Excited State ( $S_1$ )

|   |         |          |          |
|---|---------|----------|----------|
| N | 2.60440 | 0.68181  | 9.75647  |
| N | 3.14866 | -0.06185 | 13.94640 |
| N | 3.33270 | 1.10574  | 14.51447 |
| N | 1.35158 | 3.52841  | 8.01205  |
| N | 2.95975 | 0.21308  | 12.66996 |
| N | 1.74843 | 4.81818  | 7.74624  |
| N | 2.48638 | 2.79293  | 7.68160  |
| C | 2.35178 | 0.45272  | 8.42105  |
| C | 2.11474 | -0.92425 | 8.14357  |
| C | 2.24249 | -1.59744 | 9.44326  |
| C | 1.81338 | -1.34995 | 6.85466  |
| H | 1.63707 | -2.40571 | 6.63410  |
| C | 2.27128 | 1.40807  | 7.39226  |

|                                                             |         |          |          |    |         |          |          |
|-------------------------------------------------------------|---------|----------|----------|----|---------|----------|----------|
| C                                                           | 2.53500 | -0.52407 | 10.36391 | Li | 4.88384 | 6.22940  | 8.49280  |
| C                                                           | 1.72829 | -0.39820 | 5.82013  | Li | 3.69477 | 3.91590  | 9.02966  |
| C                                                           | 2.98930 | 4.87012  | 7.11043  | Li | 6.48235 | 8.26720  | 9.48680  |
| C                                                           | 1.94090 | 0.97048  | 6.11950  | O  | 2.78157 | 3.08466  | 10.55556 |
| H                                                           | 1.85334 | 1.71040  | 5.32129  | O  | 7.81351 | 7.59993  | 10.73573 |
| C                                                           | 3.44201 | 3.59598  | 7.05210  | N  | 5.34205 | 5.10123  | 10.17886 |
| H                                                           | 4.37929 | 3.19421  | 6.68125  | N  | 3.72608 | 7.52814  | 10.85423 |
| C                                                           | 3.02821 | 1.55858  | 12.41169 | N  | 2.44868 | 7.88229  | 11.00262 |
| H                                                           | 2.89067 | 1.92791  | 11.39410 | N  | 2.25540 | 8.66974  | 9.96182  |
| C                                                           | 2.69867 | -0.83142 | 11.73424 | N  | 6.51802 | 3.37545  | 8.07184  |
| C                                                           | 2.13249 | -2.89697 | 9.88448  | N  | 7.49237 | 3.43140  | 7.15685  |
| H                                                           | 1.90986 | -3.71126 | 9.19038  | N  | 6.80936 | 3.60804  | 6.04397  |
| C                                                           | 3.39276 | 2.63560  | 16.42718 | C  | 5.10974 | 5.60191  | 11.43837 |
| H                                                           | 3.80119 | 2.72874  | 17.44413 | C  | 4.32897 | 6.69477  | 11.83462 |
| H                                                           | 2.30831 | 2.82587  | 16.50050 | C  | 4.18561 | 6.99671  | 13.17598 |
| C                                                           | 3.27445 | 2.15038  | 13.63341 | H  | 3.57628 | 7.84835  | 13.44693 |
| C                                                           | 3.63312 | 1.20435  | 15.95213 | C  | 4.82561 | 6.25123  | 14.17711 |
| H                                                           | 4.68585 | 0.90817  | 16.08496 | C  | 5.64617 | 5.19717  | 13.80059 |
| H                                                           | 3.00113 | 0.46990  | 16.46868 | H  | 6.17011 | 4.62803  | 14.56005 |
| C                                                           | 2.58530 | -2.15600 | 12.17166 | C  | 5.79791 | 4.87336  | 12.45513 |
| H                                                           | 2.71105 | -2.38179 | 13.22982 | C  | 6.54907 | 3.87706  | 11.75724 |
| C                                                           | 2.30658 | -3.19148 | 11.26804 | C  | 6.22574 | 4.06434  | 10.38153 |
| C                                                           | 3.56599 | 6.19411  | 6.71669  | C  | 6.85542 | 3.23728  | 9.44269  |
| H                                                           | 4.30450 | 6.05754  | 5.91335  | C  | 7.77655 | 2.29424  | 9.85402  |
| H                                                           | 4.10752 | 6.62631  | 7.57795  | H  | 8.24829 | 1.67511  | 9.10269  |
| C                                                           | 4.04272 | 3.65245  | 15.48158 | C  | 8.09966 | 2.11613  | 11.20802 |
| H                                                           | 3.92048 | 4.67189  | 15.87411 | C  | 7.46691 | 2.90873  | 12.15464 |
| H                                                           | 5.12829 | 3.46368  | 15.42288 | H  | 7.70461 | 2.78189  | 13.20469 |
| C                                                           | 1.34289 | 7.19328  | 7.36421  | C  | 4.36874 | 8.03798  | 9.75414  |
| H                                                           | 1.76653 | 7.53273  | 8.32586  | C  | 3.35559 | 8.78645  | 9.17363  |
| H                                                           | 0.55565 | 7.91156  | 7.08982  | C  | 3.33270 | 9.60894  | 7.94032  |
| C                                                           | 0.71057 | 5.81435  | 7.54275  | H  | 3.92374 | 9.10497  | 7.17819  |
| H                                                           | 0.03277 | 5.78434  | 8.40874  | H  | 3.84668 | 10.54916 | 8.15000  |
| H                                                           | 0.11429 | 5.54384  | 6.64961  | C  | 0.91524 | 9.14368  | 9.63935  |
| C                                                           | 3.42149 | 3.57075  | 14.07891 | H  | 0.43414 | 9.45400  | 10.56349 |
| H                                                           | 2.41827 | 4.03166  | 14.08171 | H  | 0.37101 | 8.29180  | 9.23110  |
| H                                                           | 4.01444 | 4.12587  | 13.33692 | C  | 5.23118 | 3.50664  | 7.60898  |
| C                                                           | 2.44716 | 7.16160  | 6.30098  | C  | 5.46066 | 3.66527  | 6.24760  |
| H                                                           | 2.01694 | 6.83776  | 5.33684  | C  | 4.53390 | 3.94319  | 5.12062  |
| H                                                           | 2.86167 | 8.16902  | 6.14498  | H  | 4.16741 | 4.96549  | 5.23592  |
| C                                                           | 1.43135 | -0.81364 | 4.40724  | H  | 3.65292 | 3.31112  | 5.21380  |
| H                                                           | 2.31487 | -0.66625 | 3.76236  | C  | 5.21489 | 3.77322  | 3.76822  |
| H                                                           | 1.14237 | -1.87214 | 4.34391  | H  | 4.58916 | 4.20237  | 2.98699  |
| H                                                           | 0.61884 | -0.20519 | 3.97875  | H  | 5.32667 | 2.71127  | 3.53373  |
| C                                                           | 2.16713 | -4.60776 | 11.74740 | C  | 6.58307 | 4.44081  | 3.77357  |
| H                                                           | 2.42028 | -4.70876 | 12.81145 | H  | 7.05088 | 4.39222  | 2.79074  |
| H                                                           | 1.13164 | -4.96312 | 11.60740 | H  | 6.47630 | 5.49466  | 4.03284  |
| H                                                           | 2.81580 | -5.28527 | 11.16869 | C  | 7.50989 | 3.78025  | 4.77593  |
| <b>Compound <sup>Li5</sup> Ground State (S<sub>0</sub>)</b> |         |          |          | H  | 7.83174 | 2.79754  | 4.42876  |
| I                                                           | 2.19194 | 5.79346  | 7.68528  | H  | 8.39263 | 4.38243  | 4.97198  |
| I                                                           | 6.92115 | 7.22154  | 6.87443  | C  | 1.90945 | 9.86520  | 7.46025  |
|                                                             |         |          |          | H  | 1.91093 | 10.64639 | 6.70122  |
|                                                             |         |          |          | H  | 1.52078 | 8.95907  | 6.99452  |

|    |          |          |          |   |          |          |          |
|----|----------|----------|----------|---|----------|----------|----------|
| C  | 1.00782  | 10.26327 | 8.62078  | H | 5.67722  | 15.52856 | 11.81430 |
| H  | 1.39145  | 11.16755 | 9.09833  | H | 5.08747  | 13.96306 | 11.24844 |
| H  | 0.00041  | 10.48917 | 8.27270  | C | 11.73956 | 8.48124  | 8.84757  |
| I  | 11.44075 | 12.55526 | 8.61954  | H | 11.73813 | 7.69871  | 9.60527  |
| I  | 6.72719  | 11.07797 | 9.40104  | H | 12.10865 | 9.39224  | 9.31963  |
| Li | 8.75177  | 12.09560 | 7.79217  | C | 12.66227 | 8.09767  | 7.69878  |
| Li | 9.91293  | 14.41873 | 7.32486  | H | 12.29580 | 7.19023  | 7.21382  |
| Li | 7.18139  | 10.03062 | 6.78924  | H | 13.66742 | 7.88281  | 8.06009  |
| O  | 10.76588 | 15.40904 | 5.87119  | C | 9.12961  | 11.77680 | 0.67608  |
| O  | 5.87609  | 10.72176 | 5.52761  | H | 10.16618 | 11.94235 | 0.37744  |
| N  | 8.31553  | 13.24419 | 6.11467  | H | 8.90646  | 10.72796 | 0.47739  |
| N  | 9.94576  | 10.82026 | 5.44600  | H | 8.50123  | 12.37767 | 0.02207  |
| N  | 11.22844 | 10.47953 | 5.31287  | C | 4.64252  | 17.33392 | 4.63760  |
| N  | 11.41490 | 9.68461  | 6.34872  | H | 4.56075  | 17.39623 | 3.55451  |
| N  | 7.08629  | 14.95033 | 8.21361  | H | 3.64535  | 17.13115 | 5.03154  |
| N  | 6.08114  | 14.90124 | 9.09572  | H | 4.93311  | 18.31962 | 5.00360  |
| N  | 6.72433  | 14.69604 | 10.22769 | C | 4.62711  | 6.61151  | 15.61845 |
| C  | 8.57214  | 12.75383 | 4.85545  | H | 3.60172  | 6.42323  | 15.94144 |
| C  | 9.35491  | 11.66072 | 4.46431  | H | 5.28424  | 6.03281  | 16.26416 |
| C  | 9.52254  | 11.36982 | 3.12344  | H | 4.82817  | 7.66747  | 15.80212 |
| H  | 10.13301 | 10.51758 | 2.85710  | C | 9.11058  | 1.08281  | 11.60416 |
| C  | 8.90783  | 12.12814 | 2.11622  | H | 9.20372  | 1.01631  | 12.68610 |
| C  | 8.09123  | 13.18741 | 2.48585  | H | 8.84236  | 0.09229  | 11.23450 |
| H  | 7.58955  | 13.76972 | 1.72144  | H | 10.09880 | 1.31392  | 11.20303 |
| C  | 7.91532  | 13.50001 | 3.83103  | C | 5.05893  | 11.87276 | 5.69849  |
| C  | 7.16302  | 14.50058 | 4.52110  | H | 5.35892  | 12.66671 | 5.01651  |
| C  | 7.44824  | 14.29289 | 5.90267  | H | 4.00943  | 11.62192 | 5.52349  |
| C  | 6.79854  | 15.11390 | 6.83414  | H | 5.19220  | 12.21136 | 6.72094  |
| C  | 5.90339  | 16.07568 | 6.40880  | C | 5.88751  | 10.24041 | 4.19042  |
| H  | 5.41675  | 16.68979 | 7.15476  | H | 6.50400  | 9.34652  | 4.17947  |
| C  | 5.62302  | 16.27743 | 5.04879  | H | 4.87683  | 9.97755  | 3.86810  |
| C  | 6.26961  | 15.48616 | 4.11059  | H | 6.30779  | 10.98593 | 3.51406  |
| H  | 6.06268  | 15.62838 | 3.05600  | C | 10.14321 | 16.52431 | 5.24958  |
| C  | 9.29280  | 10.29511 | 6.53289  | H | 10.89389 | 17.20795 | 4.84435  |
| C  | 10.30519 | 9.55148  | 7.12087  | H | 9.47246  | 16.20457 | 4.45023  |
| C  | 10.32022 | 8.71784  | 8.34663  | H | 9.56319  | 17.03647 | 6.01198  |
| H  | 9.70701  | 9.20239  | 9.10379  | C | 11.54082 | 14.62766 | 4.96571  |
| H  | 9.82733  | 7.77065  | 8.11818  | H | 12.38103 | 15.21112 | 4.58141  |
| C  | 12.75562 | 9.22163  | 6.68511  | H | 11.91327 | 13.77353 | 5.52405  |
| H  | 13.25019 | 8.91911  | 5.76552  | H | 10.92749 | 14.27703 | 4.13426  |
| H  | 13.28676 | 10.07756 | 7.10206  | C | 3.44794  | 2.14519  | 11.38862 |
| C  | 8.35376  | 14.78828 | 8.71669  | H | 4.00560  | 2.65338  | 12.17681 |
| C  | 8.07720  | 14.61342 | 10.06672 | H | 2.73089  | 1.45256  | 11.83727 |
| C  | 8.95945  | 14.28977 | 11.21659 | H | 4.14304  | 1.59175  | 10.76417 |
| H  | 9.28504  | 13.25341 | 11.10208 | C | 1.89324  | 3.92873  | 11.28511 |
| H  | 9.86789  | 14.88540 | 11.15514 | H | 1.48632  | 4.64549  | 10.57858 |
| C  | 8.24540  | 14.47348 | 12.55004 | H | 1.08503  | 3.34008  | 11.72610 |
| H  | 8.83406  | 14.02015 | 13.34634 | H | 2.42886  | 4.46146  | 12.07273 |
| H  | 8.16071  | 15.53707 | 12.78829 | C | 7.81562  | 8.08753  | 12.07085 |
| C  | 6.85777  | 13.84873 | 12.50132 | H | 7.18497  | 8.97124  | 12.08768 |
| H  | 6.36218  | 13.91055 | 13.46971 | H | 7.41798  | 7.33869  | 12.75712 |
| H  | 6.94040  | 12.79260 | 12.24344 | H | 8.82695  | 8.36824  | 12.37544 |
| C  | 5.98145  | 14.53813 | 11.47311 | C | 8.64737  | 6.46187  | 10.55770 |



|   |         |         |          |
|---|---------|---------|----------|
| H | 9.69460 | 6.73049 | 10.71888 |
| H | 8.36811 | 5.66491 | 11.24483 |
| H | 8.50768 | 6.11873 | 9.53763  |

**Compound Li<sup>5truncated</sup> Ground State (S<sub>0</sub>)**

|    |         |          |          |
|----|---------|----------|----------|
| I  | 2.27905 | 6.42976  | 7.58815  |
| I  | 7.15066 | 7.64784  | 7.07711  |
| Li | 4.97474 | 6.48378  | 8.11400  |
| Li | 3.81092 | 4.49883  | 8.80338  |
| Li | 6.54307 | 7.70267  | 9.72078  |
| O  | 3.05489 | 3.71451  | 10.36342 |
| O  | 7.89799 | 7.51870  | 11.04156 |
| N  | 5.49250 | 5.61407  | 9.95023  |
| N  | 3.81536 | 7.90320  | 10.86850 |
| N  | 2.54222 | 8.27962  | 10.88559 |
| N  | 2.49597 | 9.18200  | 9.93245  |
| N  | 6.60175 | 4.00087  | 7.69149  |
| N  | 7.50177 | 3.95202  | 6.72410  |
| N  | 6.79120 | 4.19472  | 5.64773  |
| C  | 5.12925 | 5.88604  | 11.25802 |
| C  | 4.28467 | 6.89789  | 11.76127 |
| C  | 3.99508 | 6.96010  | 13.12157 |
| H  | 3.33021 | 7.75377  | 13.46925 |
| C  | 4.55868 | 6.04844  | 14.04291 |
| C  | 5.45457 | 5.08574  | 13.56843 |
| H  | 5.93438 | 4.39685  | 14.27008 |
| C  | 5.74282 | 5.00402  | 12.20085 |
| C  | 6.59518 | 4.14660  | 11.41489 |
| C  | 6.36228 | 4.53974  | 10.05828 |
| C  | 6.98424 | 3.78340  | 9.04449  |
| C  | 7.88435 | 2.77100  | 9.37473  |
| H  | 8.35431 | 2.21406  | 8.56185  |
| C  | 8.16839 | 2.43720  | 10.71475 |
| C  | 7.49385 | 3.12138  | 11.73241 |
| H  | 7.67163 | 2.84450  | 12.77650 |
| C  | 4.62713 | 8.52365  | 9.94307  |
| C  | 3.70847 | 9.37477  | 9.32367  |
| C  | 3.83755 | 10.27229 | 8.13377  |
| H  | 3.94294 | 9.62526  | 7.24497  |
| H  | 4.77516 | 10.84419 | 8.20184  |
| C  | 1.22359 | 9.81363  | 9.57712  |
| H  | 1.01108 | 10.59961 | 10.32105 |
| H  | 0.44748 | 9.04055  | 9.65722  |
| C  | 5.30327 | 4.26395  | 7.30285  |
| C  | 5.46415 | 4.39365  | 5.92140  |
| C  | 4.50595 | 4.77089  | 4.83718  |
| H  | 4.27283 | 5.84421  | 4.95245  |
| H  | 3.55059 | 4.25073  | 4.99587  |
| C  | 5.08685 | 4.49935  | 3.44307  |
| H  | 5.05176 | 3.41731  | 3.21992  |
| H  | 4.46703 | 4.99770  | 2.68261  |
| C  | 6.53381 | 4.99857  | 3.35062  |

|   |         |          |          |
|---|---------|----------|----------|
| H | 6.94147 | 4.84534  | 2.33904  |
| H | 6.56411 | 6.08167  | 3.55871  |
| C | 7.44596 | 4.27986  | 4.34293  |
| H | 7.67489 | 3.25445  | 4.00820  |
| H | 8.39331 | 4.81594  | 4.49058  |
| C | 2.61730 | 11.18904 | 7.98058  |
| H | 2.66329 | 12.00549 | 8.72477  |
| H | 2.63262 | 11.66730 | 6.98951  |
| C | 1.31841 | 10.39498 | 8.16706  |
| H | 0.43688 | 11.03100 | 7.99031  |
| H | 1.28352 | 9.56709  | 7.43996  |
| C | 4.21854 | 6.14125  | 15.50928 |
| H | 3.15839 | 5.89721  | 15.69738 |
| H | 4.82688 | 5.44357  | 16.10350 |
| H | 4.39492 | 7.15646  | 15.90287 |
| C | 9.14950 | 1.33957  | 11.05221 |
| H | 8.67295 | 0.54564  | 11.65195 |
| H | 9.56479 | 0.86994  | 10.14750 |
| H | 9.99636 | 1.72697  | 11.64362 |
| C | 3.48858 | 2.51318  | 10.96830 |
| H | 3.80776 | 2.69592  | 12.00961 |
| H | 2.68581 | 1.75209  | 10.95362 |
| H | 4.35354 | 2.14481  | 10.39908 |
| C | 2.00544 | 4.38297  | 11.04772 |
| H | 1.80493 | 5.31599  | 10.50414 |
| H | 1.09151 | 3.76128  | 11.05871 |
| H | 2.31128 | 4.62220  | 12.08106 |
| C | 7.76632 | 7.68498  | 12.43974 |
| H | 6.73272 | 7.99039  | 12.64599 |
| H | 7.96672 | 6.73759  | 12.96831 |
| H | 8.46261 | 8.46139  | 12.80617 |
| C | 9.17548 | 7.05396  | 10.63109 |
| H | 9.97123 | 7.71710  | 11.01616 |
| H | 9.34818 | 6.02416  | 10.99321 |
| H | 9.19079 | 7.06611  | 9.53210  |

**Compound Li<sup>5truncated</sup> Excited State (S<sub>1</sub>)**

|    |         |         |          |
|----|---------|---------|----------|
| I  | 2.30741 | 4.28027 | 7.67331  |
| I  | 6.71973 | 7.01028 | 6.71811  |
| Li | 4.72080 | 6.11796 | 8.42932  |
| Li | 3.99286 | 3.72471 | 9.58353  |
| Li | 6.24411 | 7.80603 | 9.23505  |
| O  | 3.26776 | 2.98937 | 11.11718 |
| O  | 7.50820 | 7.73612 | 10.61442 |
| N  | 5.34332 | 5.13556 | 10.06727 |
| N  | 3.62560 | 7.52244 | 10.77445 |
| N  | 2.53543 | 8.26931 | 11.14185 |
| N  | 2.40574 | 9.12646 | 10.09130 |
| N  | 6.44691 | 3.31634 | 7.95248  |
| N  | 7.43708 | 3.32125 | 7.07348  |
| N  | 6.83297 | 3.48746 | 5.92461  |
| C  | 5.09343 | 5.63738 | 11.35106 |

[illegible]

|    |          |          |          |
|----|----------|----------|----------|
| H  | 2.40630  | 4.11360  | -0.03429 |
| C  | 2.00340  | 6.26672  | 0.05610  |
| H  | 2.00420  | 6.31293  | -1.04790 |
| H  | 2.99357  | 6.61345  | 0.38905  |
| C  | 0.91731  | 7.20339  | 0.59805  |
| H  | 1.10123  | 8.24053  | 0.27633  |
| H  | 0.94121  | 7.19689  | 1.70134  |
| C  | -0.47456 | 6.79125  | 0.11850  |
| H  | -0.61330 | 7.02335  | -0.95099 |
| H  | -1.27606 | 7.29488  | 0.67616  |
| C  | 3.81998  | -0.75515 | 0.71209  |
| H  | 4.10129  | -0.40941 | -0.29962 |
| H  | 3.74674  | 0.14503  | 1.34317  |
| C  | 4.87691  | -1.73381 | 1.24321  |
| H  | 5.88312  | -1.33069 | 1.05177  |
| H  | 4.77392  | -1.82494 | 2.33896  |
| C  | 4.73877  | -3.12027 | 0.60193  |
| H  | 5.50806  | -3.80835 | 0.98610  |
| H  | 4.89250  | -3.04618 | -0.48878 |
| C  | 3.36930  | -3.73817 | 0.88417  |
| H  | 3.29947  | -4.07975 | 1.93028  |
| H  | 3.15660  | -4.59978 | 0.23644  |
| N  | -1.43533 | 0.47401  | 0.57030  |
| Br | 2.06224  | 1.84203  | 2.80523  |
| Mg | 0.44856  | 1.17753  | 0.98424  |

**Compound <sup>MgBr</sup>5 Excited State (S<sub>1</sub>)**

|   |          |          |         |
|---|----------|----------|---------|
| C | -3.53182 | -3.54608 | 0.22377 |
| C | -2.11484 | -3.47144 | 0.25255 |
| C | -1.42359 | -2.25304 | 0.26370 |
| C | -2.20819 | -1.08122 | 0.22044 |
| C | -3.60923 | -1.14742 | 0.22728 |
| C | -4.29306 | -2.38140 | 0.22809 |
| H | -1.52195 | -4.38447 | 0.26692 |
| H | -5.38450 | -2.42337 | 0.21674 |
| C | -2.84656 | 1.03980  | 0.20890 |
| C | -2.95334 | 2.46705  | 0.23137 |
| C | -4.21959 | 3.04587  | 0.26390 |
| C | -5.39246 | 2.26398  | 0.27347 |
| C | -5.30068 | 0.84444  | 0.25721 |
| C | -4.06466 | 0.23972  | 0.23108 |
| H | -4.29616 | 4.13170  | 0.28860 |
| H | -6.21576 | 0.24715  | 0.26964 |
| C | -4.18299 | -4.90386 | 0.17058 |

|    |          |          |          |
|----|----------|----------|----------|
| H  | -5.27163 | -4.84016 | 0.31557  |
| H  | -3.99896 | -5.38828 | -0.80432 |
| H  | -3.76958 | -5.57496 | 0.94121  |
| C  | -6.73966 | 2.92495  | 0.27708  |
| H  | -7.16191 | 2.94788  | -0.74448 |
| H  | -7.45561 | 2.37206  | 0.90501  |
| H  | -6.68555 | 3.96358  | 0.63391  |
| C  | 0.85390  | -1.16100 | 0.54118  |
| C  | 2.09441  | -1.73938 | 0.44011  |
| C  | -0.48703 | 2.91836  | 0.46446  |
| C  | 0.18271  | 4.13468  | 0.31227  |
| N  | -0.01383 | -2.23797 | 0.30449  |
| N  | 0.61798  | -3.43388 | 0.08291  |
| N  | 1.92112  | -3.09928 | 0.19492  |
| N  | -1.79737 | 3.29430  | 0.22384  |
| N  | -1.97167 | 4.58808  | -0.06057 |
| N  | -0.75959 | 5.07594  | 0.00204  |
| C  | 1.63091  | 4.49723  | 0.39931  |
| H  | 1.91081  | 4.61199  | 1.46211  |
| H  | 2.20959  | 3.65395  | -0.00856 |
| C  | 1.92170  | 5.79489  | -0.36533 |
| H  | 1.88381  | 5.59302  | -1.45003 |
| H  | 2.94230  | 6.14049  | -0.14292 |
| C  | 0.90474  | 6.88261  | -0.00192 |
| H  | 1.13280  | 7.83056  | -0.51355 |
| H  | 0.95009  | 7.08552  | 1.08213  |
| C  | -0.51414 | 6.46872  | -0.38735 |
| H  | -0.66141 | 6.52777  | -1.47776 |
| H  | -1.28215 | 7.09180  | 0.09206  |
| C  | 3.47713  | -1.17019 | 0.50985  |
| H  | 3.44028  | -0.11145 | 0.21550  |
| H  | 3.85769  | -1.21532 | 1.54833  |
| C  | 4.42796  | -1.95855 | -0.40154 |
| H  | 5.46431  | -1.61065 | -0.26388 |
| H  | 4.16206  | -1.76705 | -1.45624 |
| C  | 4.32456  | -3.45804 | -0.10189 |
| H  | 4.58683  | -3.63587 | 0.95631  |
| H  | 5.03753  | -4.03685 | -0.71047 |
| C  | 2.91533  | -3.98329 | -0.37878 |
| H  | 2.76914  | -4.99598 | 0.03118  |
| H  | 2.74106  | -4.04777 | -1.47191 |
| N  | -1.76105 | 0.27035  | 0.17310  |
| Br | 1.90412  | 1.49708  | -1.62519 |
| Mg | 0.26341  | 0.85052  | 0.14510  |

## 7. Supplementary References

1. T. R. Chan, R. Hilgraf, K. B. Sharpless and V. V. Fokin, *Org. Lett.*, 2004, **6**, 2853-2855.
2. I. Pryjomska-Ray, D. Zornik, M. Pätzelt, K. B. Krause, L. Grubert, B. Braun-Cula, S. Hecht and C. Limberg, *Chem. Eur. J.*, 2018, **24**, 5341-5349.
3. I. Pryjomska-Ray, D. Zornik, M. Patzelt, K. B. Krause, L. Grubert, B. Braun-Cula, S. Hecht and C. Limberg, *Chem. Eur. J.*, 2018, **24**, 5341-5349.
4. M. C. Tseng, H. T. Cheng, M. J. Shen and Y. H. Chu, *Org. Lett.*, 2011, **13**, 4434-4437.
5. K. Rurack and M. Spieles, *Anal. Chem.*, 2011, **83**, 1232-1242.
6. S. Nad and H. Pal, *J. Phys. Chem. A*, 2001, **105**, 1097-1106.
7. L. Krause, R. Herbst-Irmer, G. M. Sheldrick and D. Stalke, *J. Appl. Crystallogr.*, 2015, **48**, 3-10.
8. G. Sheldrick, *Acta Crystallogr., Sect. A: Found. Crystallogr.*, 2015, **71**, 3-8.
9. C. B. Hubschle, G. M. Sheldrick and B. Dittrich, *J. Appl. Crystallogr.*, 2011, **44**, 1281-1284.
10. O. V. Dolomanov, L. J. Bourhis, R. J. Gildea, J. A. K. Howard and H. Puschmann, *J. Appl. Crystallogr.*, 2009, **42**, 339-341.
11. F. Neese, *Wiley Interdiscip. Rev. Comput. Mol. Sci.*, 2012, **2**, 73-78.
12. F. Neese, *Wiley Interdiscip. Rev. Comput. Mol. Sci.*, 2018, **8**, e1327.
13. S. H. Vosko, L. Wilk and M. Nusair, *Can. J. Phys.*, 1980, **58**, 1200-1211.
14. C. Lee, W. Yang and R. G. Parr, *Phys. Rev. B Condens. Matter*, 1988, **37**, 785-789.
15. A. D. Becke, *J. Chem. Phys.*, 1993, **98**, 5648-5652.
16. P. J. Stephens, F. J. Devlin, C. F. Chabalowski and M. J. Frisch, *J. Phys. Chem. A*, 1994, **98**, 11623-11627.
17. S. Grimme, J. Antony, S. Ehrlich and H. Krieg, *J. Chem. Phys.*, 2010, **132**, 154104.
18. S. Grimme, S. Ehrlich and L. Goerigk, *J. Comput. Chem.*, 2011, **32**, 1456-1465.
19. F. Neese, F. Wennmohs, A. Hansen and U. Becker, *Chem. Phys.*, 2009, **356**, 98-109.
20. R. Izsak and F. Neese, *J. Chem. Phys.*, 2011, **135**, 144105.
21. F. Weigend, *Phys. Chem. Chem. Phys.*, 2006, **8**, 1057-1065.
22. J. P. Perdew, *Phys. Rev. B*, 1986, **33**, 8822-8824.
23. A. D. Becke, *Phys. Rev. A*, 1988, **38**, 3098-3100.
24. T. Yanai, D. P. Tew and N. C. Handy, *Chem. Phys. Lett.*, 2004, **393**, 51-57.
25. Y. Zhao and D. G. Truhlar, *Theor. Chem. Acc.*, 2008, **120**, 215-241.
26. J. Tao, J. P. Perdew, V. N. Staroverov and G. E. Scuseria, *Phys. Rev. Lett.*, 2003, **91**, 146401.
27. V. N. Staroverov, G. E. Scuseria, J. Tao and J. P. Perdew, *J. Chem. Phys.*, 2003, **119**, 12129-12137.
28. J.-D. Chai and M. Head-Gordon, *Phys. Chem. Chem. Phys.*, 2008, **10**, 6615-6620.
29. A. Hellweg, C. Hättig, S. Höfener and W. Klopper, *Theor. Chem. Acc.*, 2007, **117**, 587-597.
30. B. de Souza, F. Neese and R. Izsak, *J. Chem. Phys.*, 2018, **148**, 034104.
31. B. de Souza, G. Farias, F. Neese and R. Izsak, *J. Chem. Theory Comput.*, 2019, **15**, 1896-1904.
32. F. Weigend and R. Ahlrichs, *Phys. Chem. Chem. Phys.*, 2005, **7**, 3297-3305.
33. C. J. Cramer and D. G. Truhlar, *Acc. Chem. Res.*, 2008, **41**, 760-768.
34. M. D. Hanwell, D. E. Curtis, D. C. Lonie, T. Vandermeersch, E. Zurek and G. R. Hutchison, *J. Cheminformatics*, 2012, **4**, 17.
35. G. Knizia, *J. Chem. Theory Comput.*, 2013, **9**, 4834-4843.
